# Supplementary material for: Copper(i) catalyzed synthesis of selanyl methylene 4-chromanol and aurone derivatives
Source: Royal Society of Chemistry journal article supplement (doi:10.1039/d0ob00632g), 2020-01-01

# Supporting Information

## Copper(I) Catalyzed Synthesis of Selanyl methylene 4-chromanol and aurone Derivatives

Sushree Ranjan Sahoo<sup>a</sup>, Debayan Sarkar<sup>a\*</sup>, Felix Henkel<sup>b</sup> and Hans Reuter<sup>b</sup>

<sup>a</sup>Organic Synthesis and Molecular Engineering Laboratory, Department of Chemistry,  
National Institute of Technology, Rourkela-769008, India; e-mail: [sarkard@nitrkl.ac.in](mailto:sarkard@nitrkl.ac.in)

<sup>b</sup>Institute of Chemistry of New Materials, University of Osnabrück, Barbarastrasse-6, 49076  
Osnabrück, Germany

### *Contents*

|                                            |     |
|--------------------------------------------|-----|
| Crystallographic Experimental Section..... | S2  |
| Copies of NMR.....                         | S10 |

## Crystallographic Experimental Section

### Sample Preparation for Crystal Growth:

5 mg of **5e** compound was kept in a round bottom (50 mL) flask, soluble in 1:1 (v/v) dry DCM and Hexane 20 mL and the leave the flask in a dark place for 4-5 days at 25 °C. After those 4-5 days, we found needle shape crystal on the wall of the flask. Dry the flask with the help of high vacuum for half an hour and took out the crystal from flask.

ORTEP diagram of **5e**; CCDC 1963733

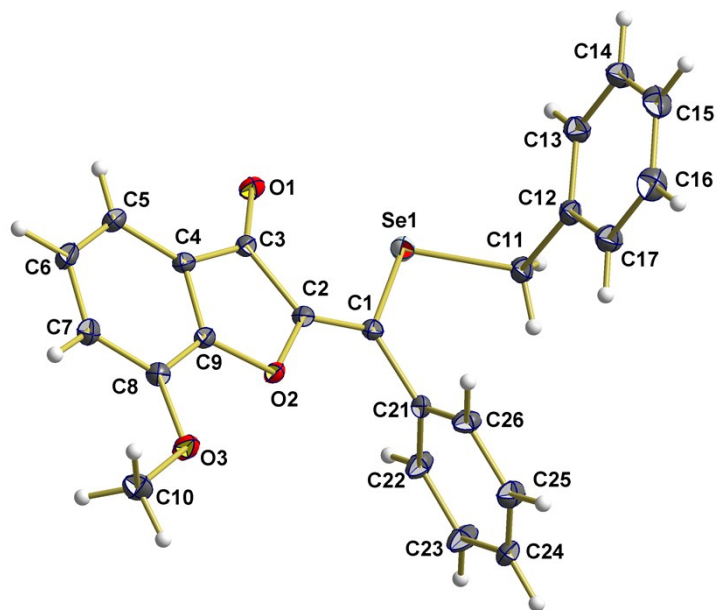

**Figure S1:** Ball-and-stick model of the solid state structure of **5e**

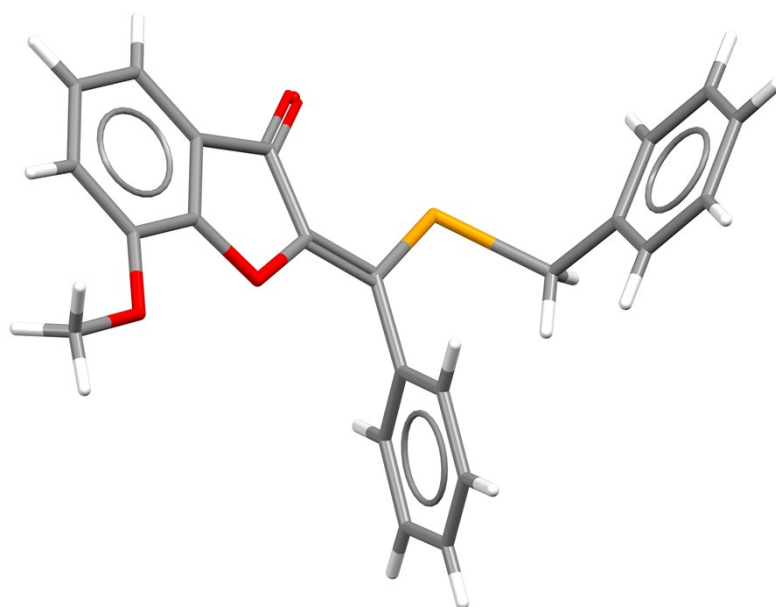

**Figure S2:** Stick-model of the solid state structure of **5e**

**Table S1.** Crystal data and structure refinement for **5e**.

|                                   |                                                                        |
|-----------------------------------|------------------------------------------------------------------------|
| Empirical formula                 | C <sub>23</sub> H <sub>18</sub> O <sub>3</sub> Se                      |
| Formula weight                    | 421.33                                                                 |
| Temperature                       | 150(2) K                                                               |
| Wavelength                        | 0.71073 Å                                                              |
| Crystal system, space group       | Monoclinic, P2(1)                                                      |
| Unit cell dimensions              | a = 12.2311(4) Å<br>b = 5.5378(2) Å β = 95.773(2)°<br>c = 13.6984(4) Å |
| Volume                            | 923.13(5) Å <sup>3</sup>                                               |
| Z, Calculated density             | 2, 1.516 g/cm <sup>3</sup>                                             |
| Absorption coefficient            | 2.055 mm <sup>-1</sup>                                                 |
| F(000)                            | 428                                                                    |
| Crystal size                      | 0.486 x 0.132 x 0.064 mm                                               |
| Theta range for data collection   | 2.989 to 27.999 deg.                                                   |
| Limiting indices                  | -16 ≤ h ≤ 16, -7 ≤ k ≤ 7, -18 ≤ l ≤ 18                                 |
| Reflections collected / unique    | 87218 / 4465 [R(int) = 0.0504]                                         |
| Completeness to theta = 25.242    | 99.8 %                                                                 |
| Absorption correction             | Semi-empirical from equivalents                                        |
| Max. and min. transmission        | 0.746 and 0.581                                                        |
| Refinement method                 | Full-matrix least-squares on F <sup>2</sup>                            |
| Data / restraints / parameters    | 4465 / 1 / 249                                                         |
| Goodness-of-fit on F <sup>2</sup> | 1.033                                                                  |
| Final R indices [I > 2σ(I)]       | R1 = 0.0211, wR2 = 0.0487                                              |
| Final R indices [all data]        | R1 = 0.0238, wR2 = 0.0498                                              |
| Absolute structure parameter      | -0.008(3)                                                              |
| Extinction coefficient            | n/a                                                                    |
| Largest diff. peak and hole       | 0.242 and -0.210 eÅ <sup>-3</sup>                                      |

**Table S2.** Atomic coordinates (x 104) and equivalent isotropic displacement parameters ( $\text{\AA}^2$  x 103) for **5e**.  $U(\text{eq})$  is defined as one third of the trace of the orthogonalized  $U_{ij}$  tensor.

|       | x       | y        | z       | $U(\text{eq})$ |
|-------|---------|----------|---------|----------------|
| Se(1) | 3120(1) | 10382(1) | 8064(1) | 24(1)          |
| C(1)  | 2529(2) | 7977(4)  | 7164(2) | 18(1)          |
| C(2)  | 1735(2) | 6561(4)  | 7457(2) | 18(1)          |
| C(3)  | 1248(2) | 6582(5)  | 8404(2) | 20(1)          |
| O(1)  | 1480(2) | 8007(4)  | 9076(1) | 26(1)          |
| C(4)  | 460(2)  | 4598(4)  | 8324(2) | 20(1)          |
| C(5)  | -254(2) | 3668(5)  | 8962(2) | 24(1)          |
| C(6)  | -919(2) | 1766(5)  | 8630(2) | 27(1)          |
| C(7)  | -878(2) | 785(5)   | 7688(2) | 25(1)          |
| C(8)  | -166(2) | 1710(5)  | 7050(2) | 21(1)          |
| O(3)  | -41(2)  | 915(3)   | 6127(1) | 28(1)          |
| C(9)  | 494(2)  | 3639(5)  | 7393(2) | 20(1)          |
| O(2)  | 1228(1) | 4780(3)  | 6843(1) | 20(1)          |
| C(10) | -737(2) | -1007(5) | 5752(2) | 30(1)          |
| C(11) | 4564(2) | 10952(4) | 7577(2) | 24(1)          |
| C(12) | 5452(2) | 9541(4)  | 8145(2) | 22(1)          |
| C(13) | 5814(2) | 10208(7) | 9108(2) | 28(1)          |
| C(14) | 6616(2) | 8878(6)  | 9656(2) | 33(1)          |
| C(15) | 7072(2) | 6867(6)  | 9252(2) | 36(1)          |
| C(16) | 6735(3) | 6212(5)  | 8291(2) | 35(1)          |
| C(17) | 5931(2) | 7543(5)  | 7745(2) | 29(1)          |
| C(21) | 2885(2) | 7824(5)  | 6158(2) | 18(1)          |
| C(22) | 2583(2) | 9629(5)  | 5481(2) | 26(1)          |
| C(23) | 2882(2) | 9459(5)  | 4530(2) | 31(1)          |
| C(24) | 3488(2) | 7521(5)  | 4253(2) | 25(1)          |
| C(25) | 3807(2) | 5749(5)  | 4929(2) | 27(1)          |
| C(26) | 3494(2) | 5885(4)  | 5878(2) | 24(1)          |

**Table S3.** Bond lengths [ $\text{\AA}$ ] and angles [ $^\circ$ ] for **5e**.

|             |          |
|-------------|----------|
| Se(1)-C(1)  | 1.907(2) |
| Se(1)-C(11) | 1.976(2) |
| C(1)-C(2)   | 1.340(3) |
| C(1)-C(21)  | 1.488(3) |
| C(2)-O(2)   | 1.400(3) |
| C(2)-C(3)   | 1.481(3) |
| C(3)-O(1)   | 1.225(3) |
| C(3)-C(4)   | 1.458(3) |
| C(4)-C(9)   | 1.386(3) |
| C(4)-C(5)   | 1.395(3) |

|                   |          |
|-------------------|----------|
| C(5)-C(6)         | 1.380(4) |
| C(6)-C(7)         | 1.406(4) |
| C(7)-C(8)         | 1.391(4) |
| C(8)-O(3)         | 1.363(3) |
| C(8)-C(9)         | 1.392(3) |
| O(3)-C(10)        | 1.425(3) |
| C(9)-O(2)         | 1.381(3) |
| C(11)-C(12)       | 1.492(3) |
| C(12)-C(17)       | 1.390(4) |
| C(12)-C(13)       | 1.398(3) |
| C(13)-C(14)       | 1.385(4) |
| C(14)-C(15)       | 1.386(5) |
| C(15)-C(16)       | 1.388(4) |
| C(16)-C(17)       | 1.386(4) |
| C(21)-C(26)       | 1.383(3) |
| C(21)-C(22)       | 1.388(3) |
| C(22)-C(23)       | 1.391(4) |
| C(23)-C(24)       | 1.380(4) |
| C(24)-C(25)       | 1.379(4) |
| C(25)-C(26)       | 1.393(3) |
|                   |          |
| C(1)-Se(1)-C(11)  | 100.8(1) |
| C(2)-C(1)-C(21)   | 122.1(2) |
| C(2)-C(1)-Se(1)   | 117.0(2) |
| C(21)-C(1)-Se(1)  | 120.7(2) |
| C(1)-C(2)-O(2)    | 121.6(2) |
| C(1)-C(2)-C(3)    | 128.7(2) |
| O(2)-C(2)-C(3)    | 109.7(2) |
| O(1)-C(3)-C(4)    | 130.0(2) |
| O(1)-C(3)-C(2)    | 125.5(2) |
| C(4)-C(3)-C(2)    | 104.5(2) |
| C(9)-C(4)-C(5)    | 120.9(2) |
| C(9)-C(4)-C(3)    | 106.1(2) |
| C(5)-C(4)-C(3)    | 133.0(2) |
| C(6)-C(5)-C(4)    | 117.4(2) |
| C(5)-C(6)-C(7)    | 121.6(2) |
| C(8)-C(7)-C(6)    | 121.0(2) |
| O(3)-C(8)-C(7)    | 126.8(2) |
| O(3)-C(8)-C(9)    | 116.5(2) |
| C(7)-C(8)-C(9)    | 116.7(2) |
| C(8)-O(3)-C(10)   | 117.2(2) |
| O(2)-C(9)-C(4)    | 114.0(2) |
| O(2)-C(9)-C(8)    | 123.6(2) |
| C(4)-C(9)-C(8)    | 122.3(2) |
| C(9)-O(2)-C(2)    | 105.6(2) |
| C(12)-C(11)-Se(1) | 111.7(2) |
| C(17)-C(12)-C(13) | 118.5(3) |
| C(17)-C(12)-C(11) | 121.6(2) |
| C(13)-C(12)-C(11) | 119.9(2) |
| C(14)-C(13)-C(12) | 120.7(3) |
| C(13)-C(14)-C(15) | 120.2(3) |

|                   |          |
|-------------------|----------|
| C(14)-C(15)-C(16) | 119.7(3) |
| C(17)-C(16)-C(15) | 120.0(3) |
| C(16)-C(17)-C(12) | 121.0(3) |
| C(26)-C(21)-C(22) | 119.2(2) |
| C(26)-C(21)-C(1)  | 121.1(2) |
| C(22)-C(21)-C(1)  | 119.7(2) |
| C(21)-C(22)-C(23) | 120.0(2) |
| C(24)-C(23)-C(22) | 120.6(2) |
| C(25)-C(24)-C(23) | 119.5(2) |
| C(24)-C(25)-C(26) | 120.2(2) |
| C(21)-C(26)-C(25) | 120.5(2) |

**Table S4.** Anisotropic displacement parameters ( $\text{\AA}^2 \times 10^3$ ) for **5e**. The anisotropic displacement factor exponent takes the form:  $-2\pi^2[h^2a^*2U_{11} + \dots + 2hka^*b^*U_{12}]$

|       | U11   | U22   | U33   | U23   | U13   | U12    |
|-------|-------|-------|-------|-------|-------|--------|
| Se(1) | 21(1) | 29(1) | 23(1) | -7(1) | 3(1)  | -3(1)  |
| C(1)  | 18(1) | 21(1) | 15(1) | 1(1)  | 1(1)  | 2(1)   |
| C(2)  | 18(1) | 22(1) | 15(1) | -1(1) | 1(1)  | 1(1)   |
| C(3)  | 17(1) | 26(1) | 15(1) | 1(1)  | 3(1)  | 3(1)   |
| O(1)  | 25(1) | 34(1) | 19(1) | -6(1) | 5(1)  | -3(1)  |
| C(4)  | 19(1) | 26(1) | 15(1) | 2(1)  | 2(1)  | 1(1)   |
| C(5)  | 23(1) | 33(1) | 17(1) | 1(1)  | 6(1)  | 0(1)   |
| C(6)  | 23(1) | 33(1) | 25(1) | 5(1)  | 9(1)  | -3(1)  |
| C(7)  | 21(1) | 29(2) | 25(1) | 2(1)  | 3(1)  | -4(1)  |
| C(8)  | 20(1) | 25(1) | 19(1) | 0(1)  | 2(1)  | 0(1)   |
| O(3)  | 30(1) | 33(1) | 21(1) | -7(1) | 7(1)  | -10(1) |
| C(9)  | 17(1) | 25(1) | 17(1) | 3(1)  | 4(1)  | 1(1)   |
| O(2)  | 20(1) | 25(1) | 15(1) | -1(1) | 6(1)  | -5(1)  |
| C(10) | 32(2) | 28(1) | 28(1) | -7(1) | 1(1)  | -6(1)  |
| C(11) | 21(1) | 25(2) | 25(1) | 6(1)  | 2(1)  | -5(1)  |
| C(12) | 20(1) | 23(1) | 24(1) | 6(1)  | 2(1)  | -5(1)  |
| C(13) | 27(1) | 29(1) | 26(1) | 2(1)  | 0(1)  | -6(2)  |
| C(14) | 28(1) | 43(2) | 26(1) | 8(1)  | -3(1) | -6(1)  |
| C(15) | 27(2) | 41(2) | 40(2) | 18(1) | -1(1) | 2(1)   |
| C(16) | 35(2) | 31(2) | 40(2) | 7(1)  | 7(1)  | 8(1)   |
| C(17) | 29(1) | 30(1) | 28(1) | 2(1)  | 1(1)  | -2(1)  |
| C(21) | 15(1) | 21(1) | 17(1) | 0(1)  | 2(1)  | -2(1)  |
| C(22) | 30(1) | 27(1) | 24(1) | 5(1)  | 10(1) | 9(1)   |
| C(23) | 39(2) | 31(1) | 25(1) | 11(1) | 10(1) | 10(1)  |
| C(24) | 23(1) | 35(2) | 20(1) | 0(1)  | 8(1)  | 1(1)   |
| C(25) | 29(1) | 26(2) | 25(1) | -3(1) | 5(1)  | 9(1)   |
| C(26) | 29(1) | 24(2) | 20(1) | 3(1)  | 2(1)  | 5(1)   |

**Table S5.** Hydrogen coordinates (x 104) and isotropic displacement parameters ( $\text{\AA}^2 \times 103$ ) for **5e**.

---

|        | x     | y     | z     | U(eq) |
|--------|-------|-------|-------|-------|
| H(5)   | -281  | 4320  | 9601  | 26(5) |
| H(6)   | -1417 | 1105  | 9048  | 26(5) |
| H(7)   | -1344 | -532  | 7483  | 26(5) |
| H(10A) | -601  | -2435 | 6169  | 46(6) |
| H(10B) | -579  | -1391 | 5082  | 46(6) |
| H(10C) | -1507 | -515  | 5748  | 46(6) |
| H(11A) | 4526  | 10489 | 6876  | 37(3) |
| H(11B) | 4742  | 12694 | 7627  | 37(3) |
| H(13)  | 5506  | 11586 | 9390  | 37(3) |
| H(14)  | 6854  | 9346  | 10310 | 37(3) |
| H(15)  | 7614  | 5941  | 9631  | 37(3) |
| H(16)  | 7055  | 4852  | 8007  | 37(3) |
| H(17)  | 5703  | 7083  | 7087  | 37(3) |
| H(22)  | 2173  | 10981 | 5667  | 37(4) |
| H(23)  | 2665  | 10689 | 4067  | 37(4) |
| H(24)  | 3685  | 7409  | 3601  | 37(4) |
| H(25)  | 4241  | 4431  | 4748  | 37(4) |
| H(26)  | 3701  | 4637  | 6336  | 37(4) |

---

**Table S6.** Torsion angles [ $^\circ$ ] for **5e**.

---

|                      |           |
|----------------------|-----------|
| C(21)-C(1)-C(2)-O(2) | 2.8(4)    |
| Se(1)-C(1)-C(2)-O(2) | 178.4(2)  |
| C(21)-C(1)-C(2)-C(3) | -176.3(2) |
| Se(1)-C(1)-C(2)-C(3) | -0.6(4)   |
| C(1)-C(2)-C(3)-O(1)  | 2.7(4)    |
| O(2)-C(2)-C(3)-O(1)  | -176.4(2) |
| C(1)-C(2)-C(3)-C(4)  | -177.8(2) |
| O(2)-C(2)-C(3)-C(4)  | 3.1(3)    |
| O(1)-C(3)-C(4)-C(9)  | 177.5(3)  |
| C(2)-C(3)-C(4)-C(9)  | -1.9(3)   |
| O(1)-C(3)-C(4)-C(5)  | -1.0(5)   |
| C(2)-C(3)-C(4)-C(5)  | 179.6(3)  |
| C(9)-C(4)-C(5)-C(6)  | 0.1(4)    |
| C(3)-C(4)-C(5)-C(6)  | 178.4(3)  |
| C(4)-C(5)-C(6)-C(7)  | 0.4(4)    |
| C(5)-C(6)-C(7)-C(8)  | -0.4(4)   |
| C(6)-C(7)-C(8)-O(3)  | 179.5(2)  |
| C(6)-C(7)-C(8)-C(9)  | -0.1(4)   |



|                         |           |
|-------------------------|-----------|
| C(7)-C(8)-O(3)-C(10)    | 2.5(4)    |
| C(9)-C(8)-O(3)-C(10)    | -178.0(2) |
| C(5)-C(4)-C(9)-O(2)     | 178.9(2)  |
| C(3)-C(4)-C(9)-O(2)     | 0.2(3)    |
| C(5)-C(4)-C(9)-C(8)     | -0.6(4)   |
| C(3)-C(4)-C(9)-C(8)     | -179.3(2) |
| O(3)-C(8)-C(9)-O(2)     | 1.6(4)    |
| C(7)-C(8)-C(9)-O(2)     | -178.8(2) |
| O(3)-C(8)-C(9)-C(4)     | -179.0(2) |
| C(7)-C(8)-C(9)-C(4)     | 0.5(4)    |
| C(4)-C(9)-O(2)-C(2)     | 1.8(3)    |
| C(8)-C(9)-O(2)-C(2)     | -178.8(2) |
| C(1)-C(2)-O(2)-C(9)     | 177.9(2)  |
| C(3)-C(2)-O(2)-C(9)     | -3.0(2)   |
| Se(1)-C(11)-C(12)-C(17) | 107.6(2)  |
| Se(1)-C(11)-C(12)-C(13) | -71.8(3)  |
| C(17)-C(12)-C(13)-C(14) | -1.2(4)   |
| C(11)-C(12)-C(13)-C(14) | 178.2(2)  |
| C(12)-C(13)-C(14)-C(15) | 0.2(4)    |
| C(13)-C(14)-C(15)-C(16) | 1.0(5)    |
| C(14)-C(15)-C(16)-C(17) | -1.1(5)   |
| C(15)-C(16)-C(17)-C(12) | 0.1(5)    |
| C(13)-C(12)-C(17)-C(16) | 1.1(4)    |
| C(11)-C(12)-C(17)-C(16) | -178.3(3) |
| C(2)-C(1)-C(21)-C(26)   | -72.3(3)  |
| Se(1)-C(1)-C(21)-C(26)  | 112.2(2)  |
| C(2)-C(1)-C(21)-C(22)   | 106.3(3)  |
| Se(1)-C(1)-C(21)-C(22)  | -69.2(3)  |
| C(26)-C(21)-C(22)-C(23) | 0.8(4)    |
| C(1)-C(21)-C(22)-C(23)  | -177.9(3) |
| C(21)-C(22)-C(23)-C(24) | -0.8(5)   |
| C(22)-C(23)-C(24)-C(25) | -0.4(5)   |
| C(23)-C(24)-C(25)-C(26) | 1.6(4)    |
| C(22)-C(21)-C(26)-C(25) | 0.3(4)    |
| C(1)-C(21)-C(26)-C(25)  | 179.0(2)  |
| C(24)-C(25)-C(26)-C(21) | -1.6(4)   |

---

# Copies of NMR:

## (E)-2-((phenylselanyl)methylene)chroman-4-ol (4a)

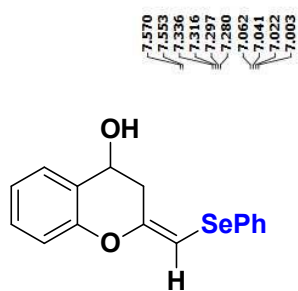

$^1\text{H}$  NMR (400 MHz,  $\text{CDCl}_3$ )

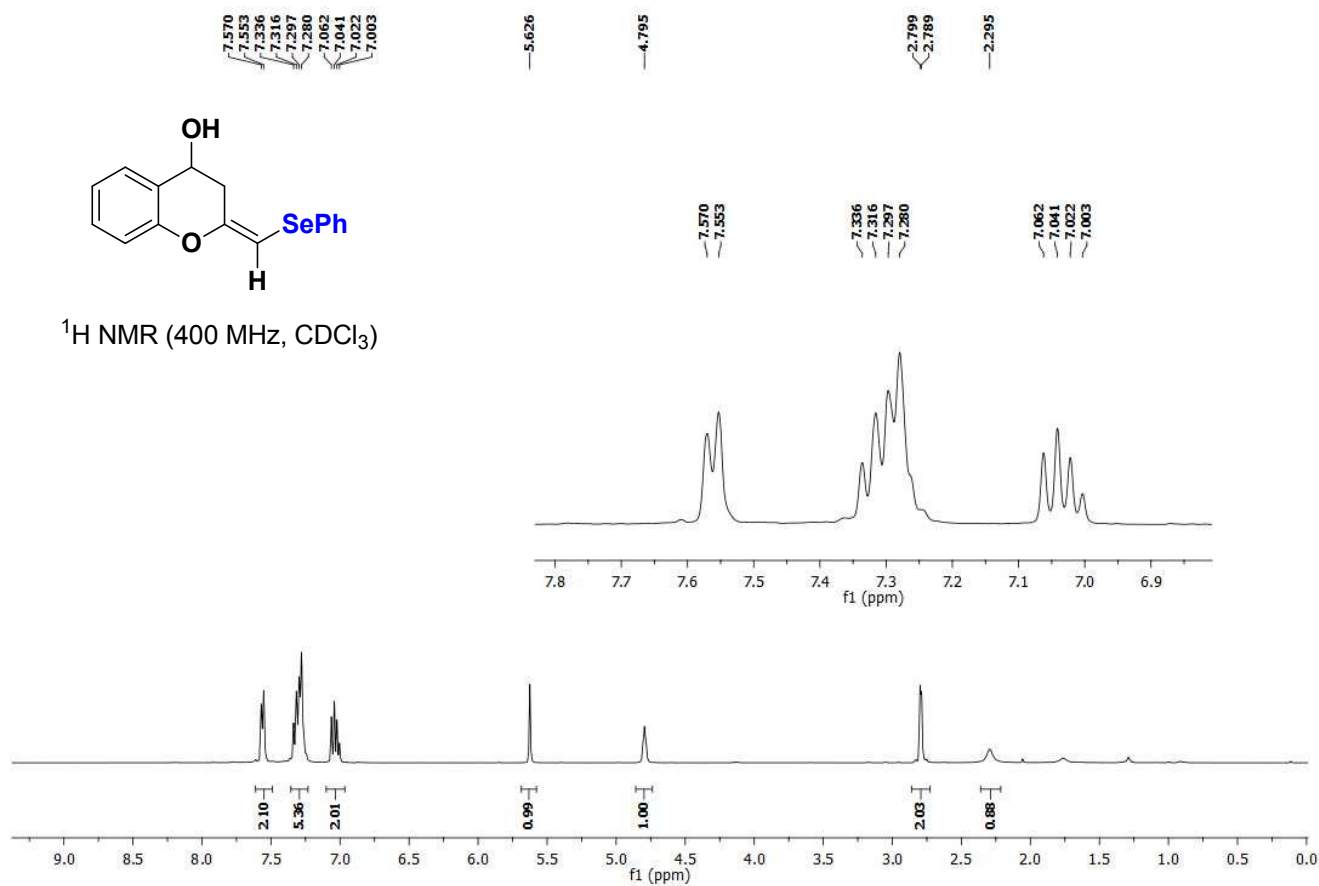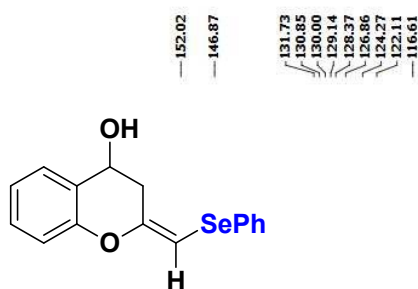

$^{13}\text{C}$  NMR (100 MHz,  $\text{CDCl}_3$ )

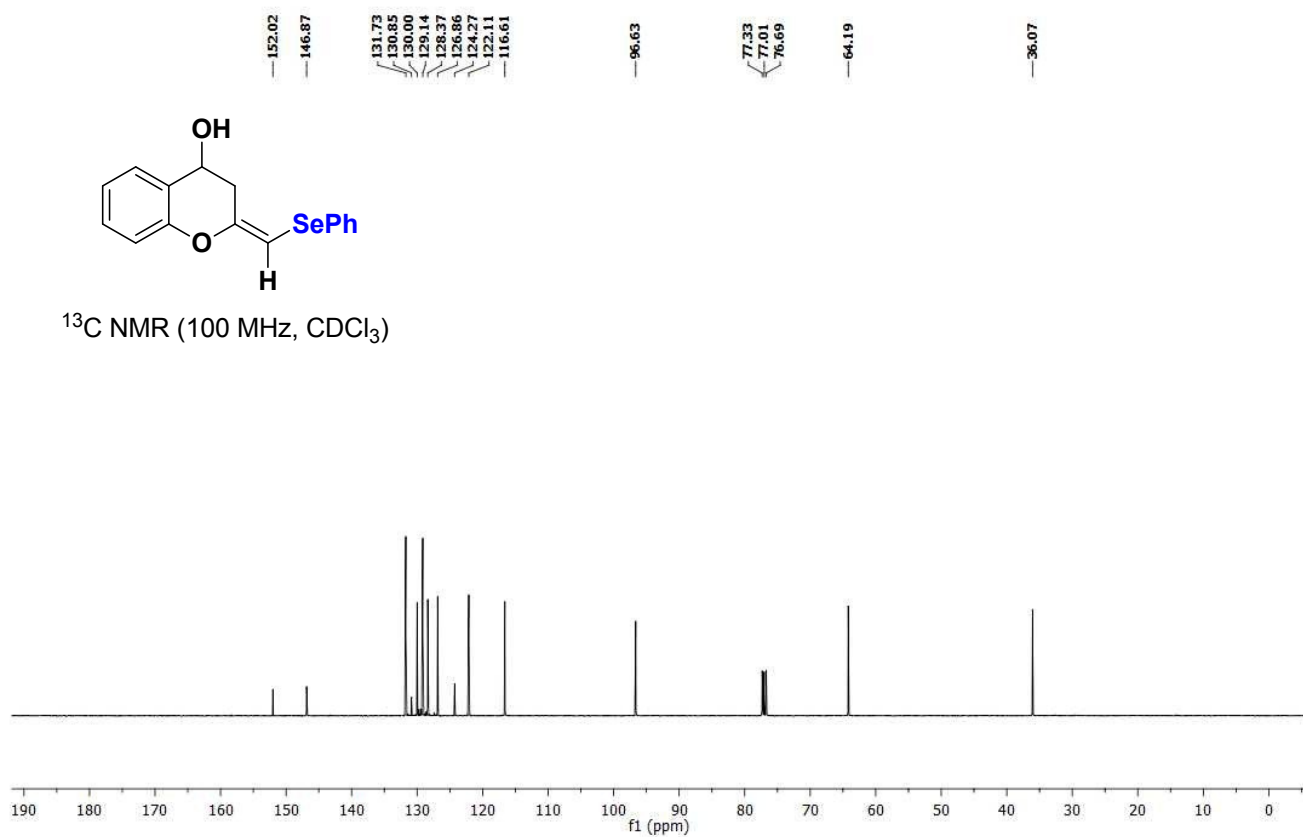

**(E)-2-((benzylselanyl)methylene)chroman-4-ol (4b)**

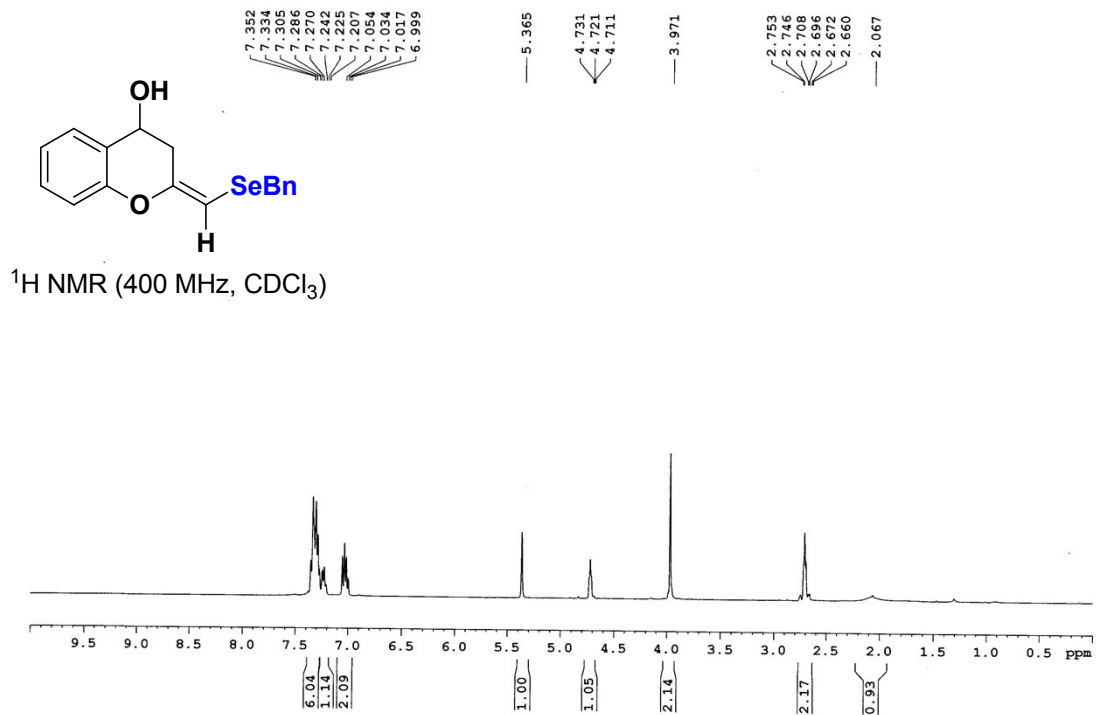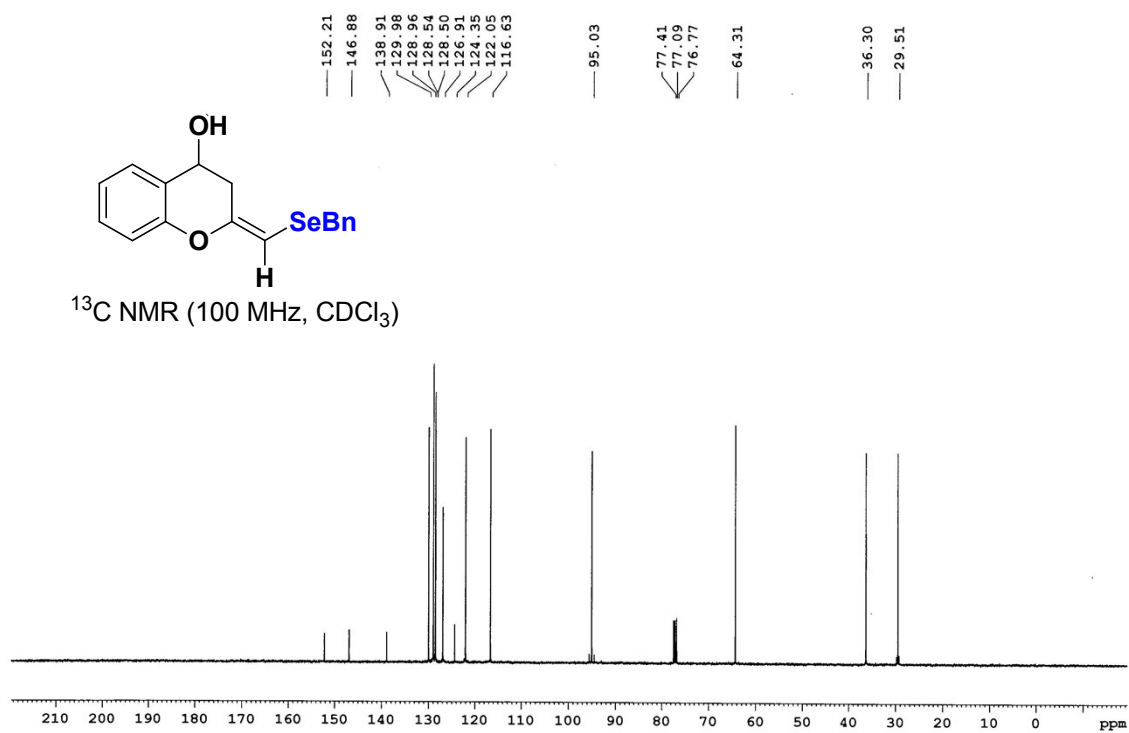

*(E)*-3-((phenylselanyl)methylene)-2,3-dihydro-1H-benzo[*f*]chromen-1-ol (**4c**)

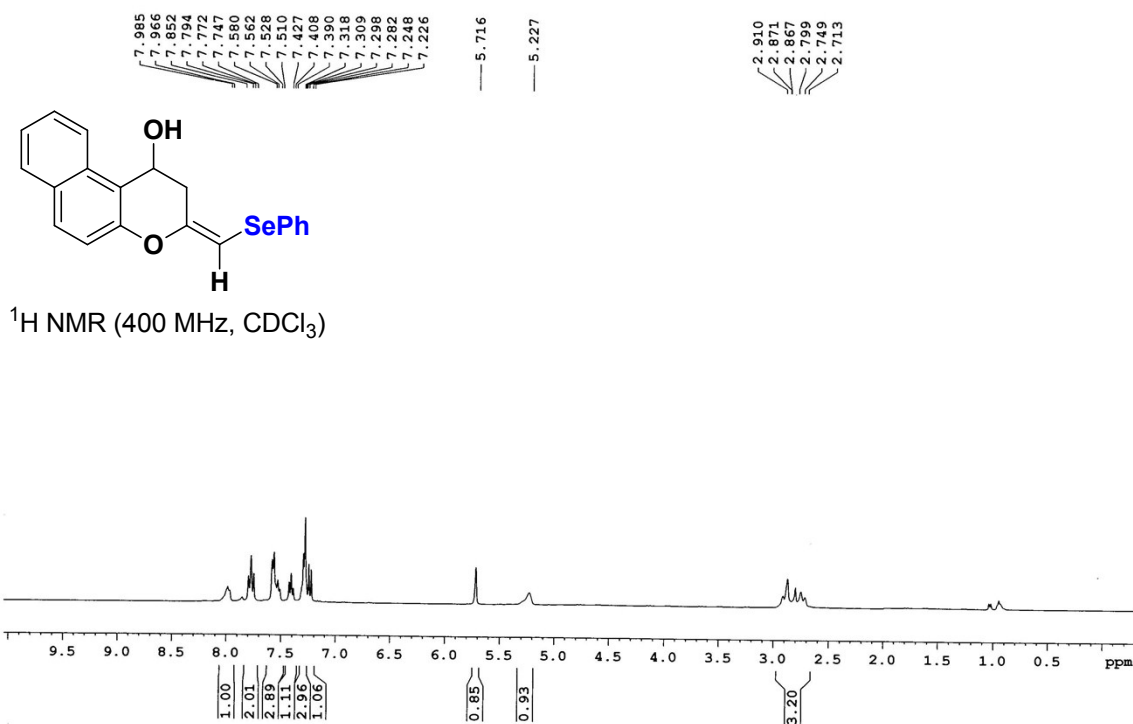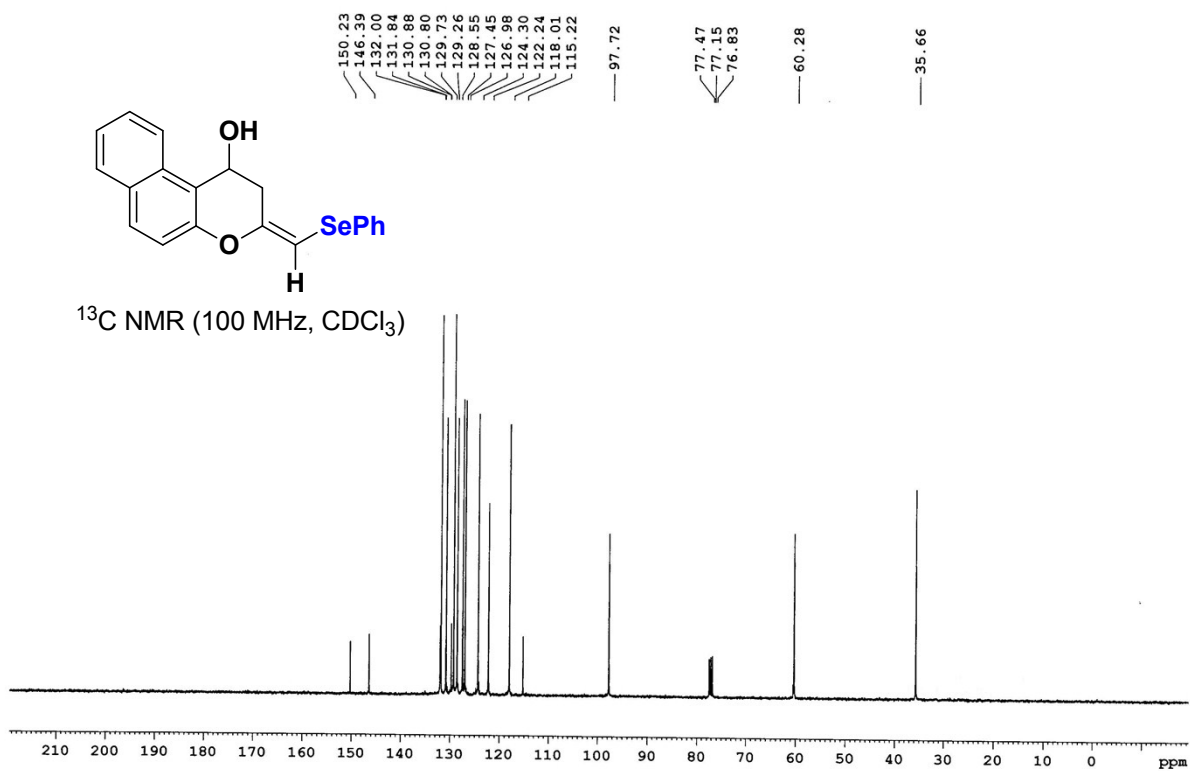

**(E)-7-methoxy-2-((phenylselanyl)methylene)chroman-4-ol (4d)**

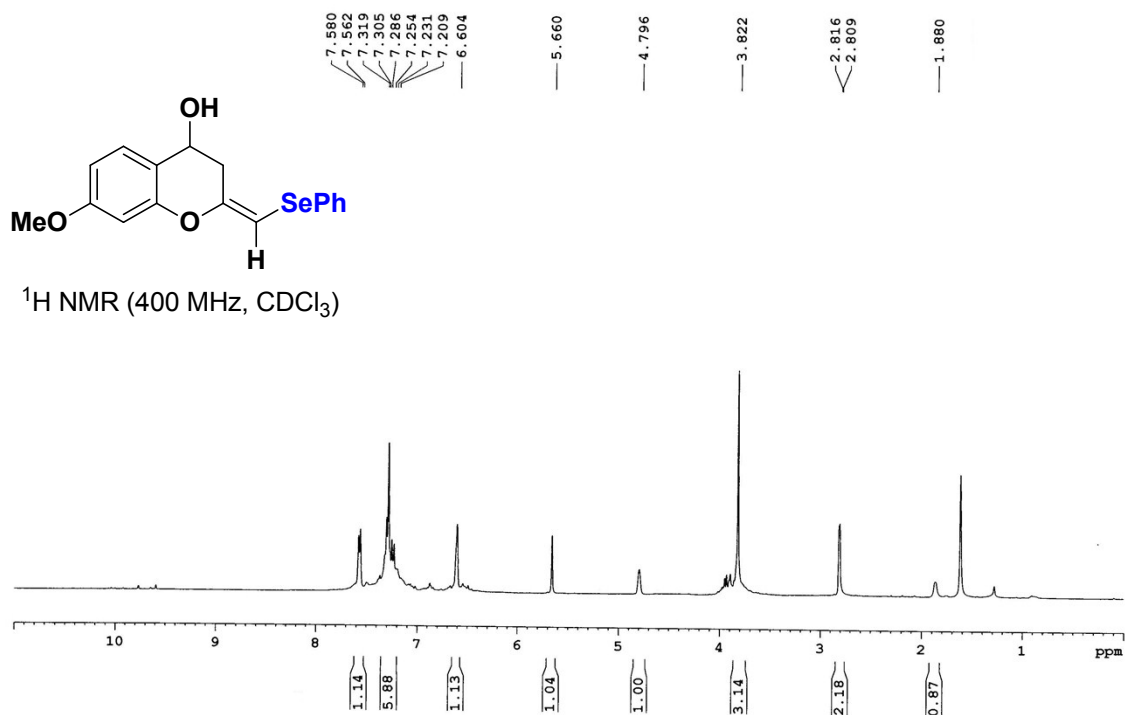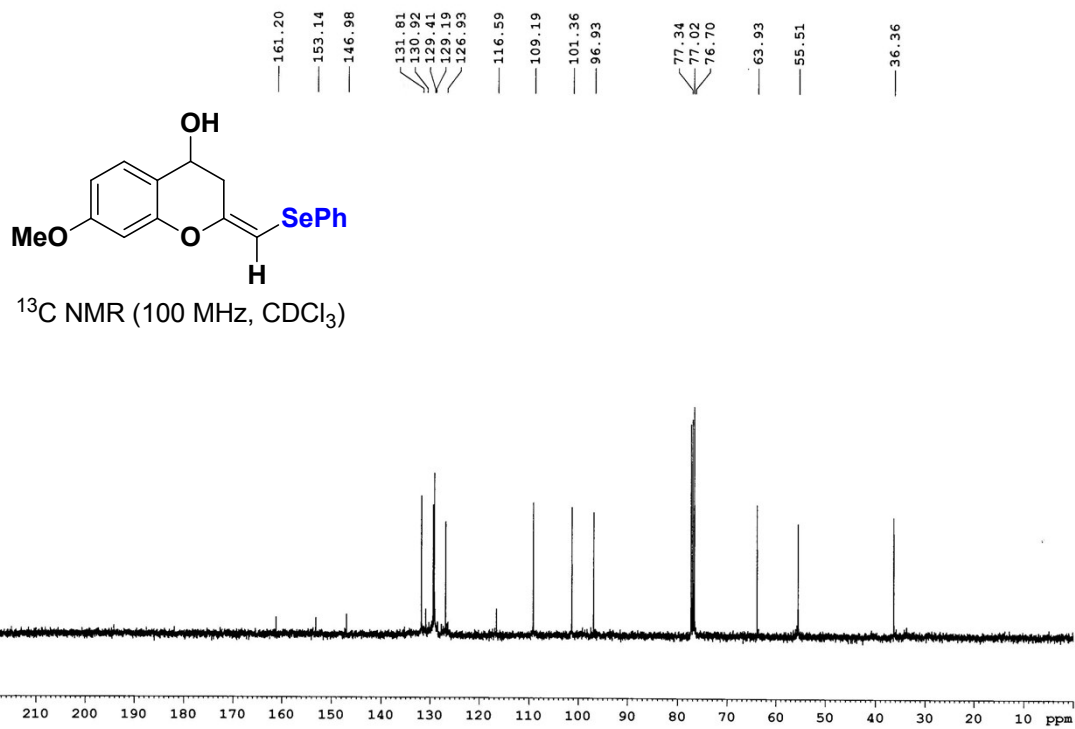

**(E)-8-bromo-6-chloro-2-((phenylselanyl)methylene)chroman-4-ol (4e)**

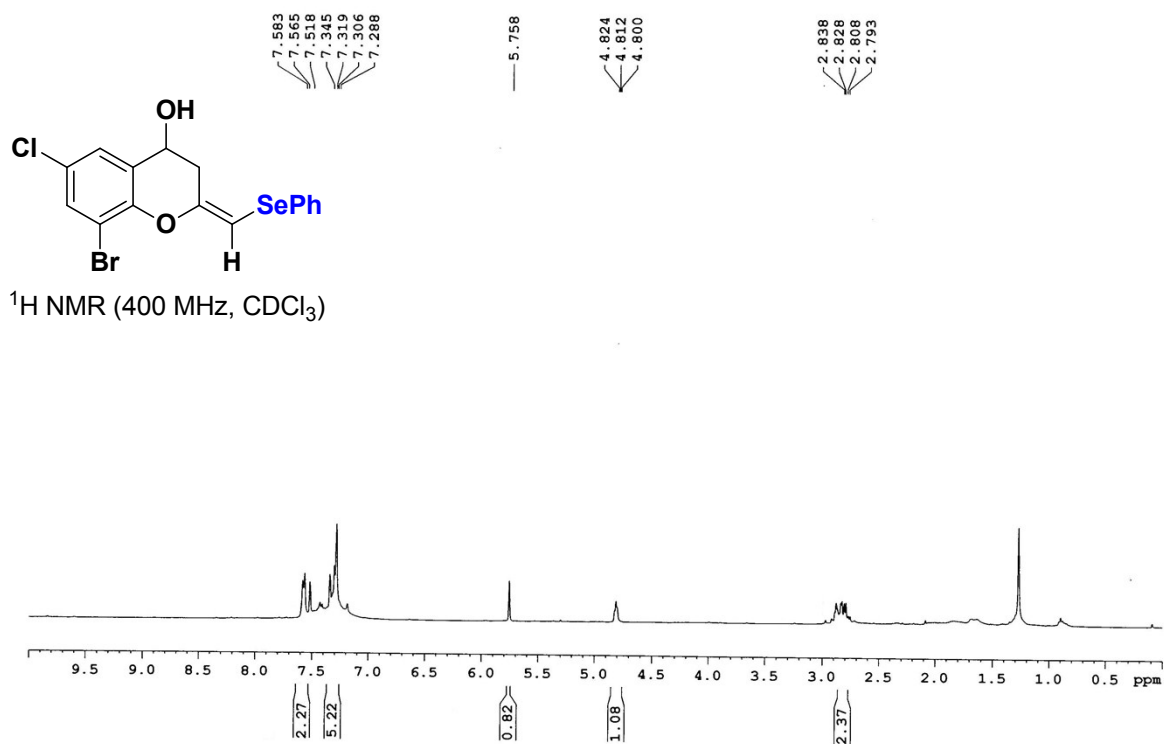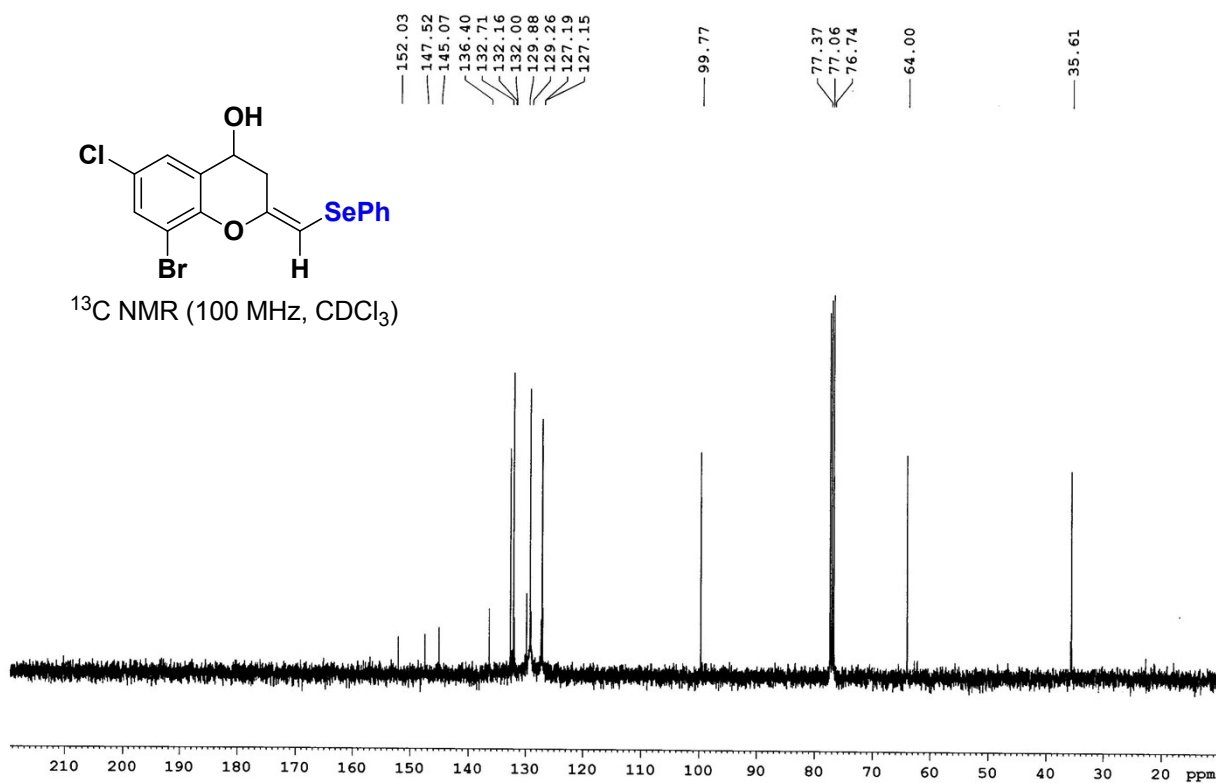

**(E)-6-methyl-2-((phenylselanyl)methylene)chroman-4-ol (4f)**

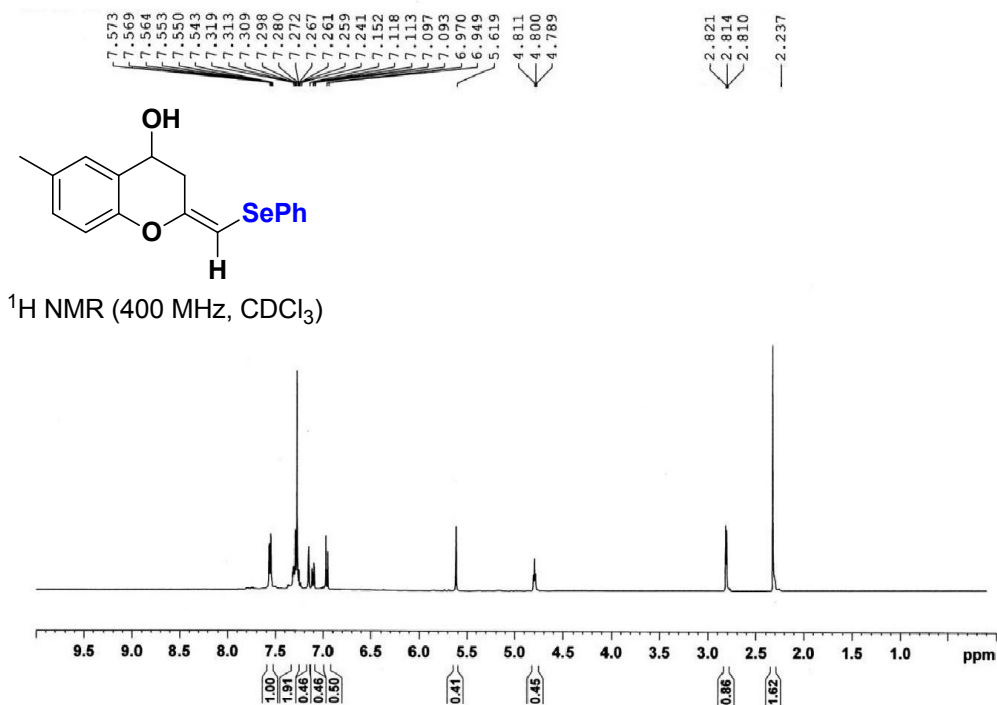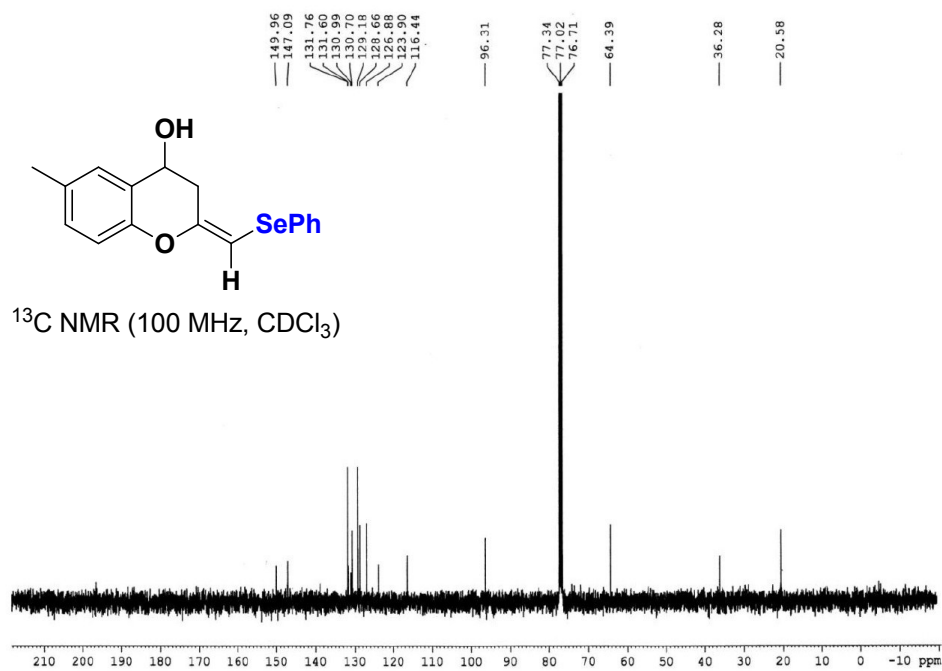

**(E)-8-bromo-6-methyl-2-((phenylselanyl)methylene)chroman-4-ol (4g)**

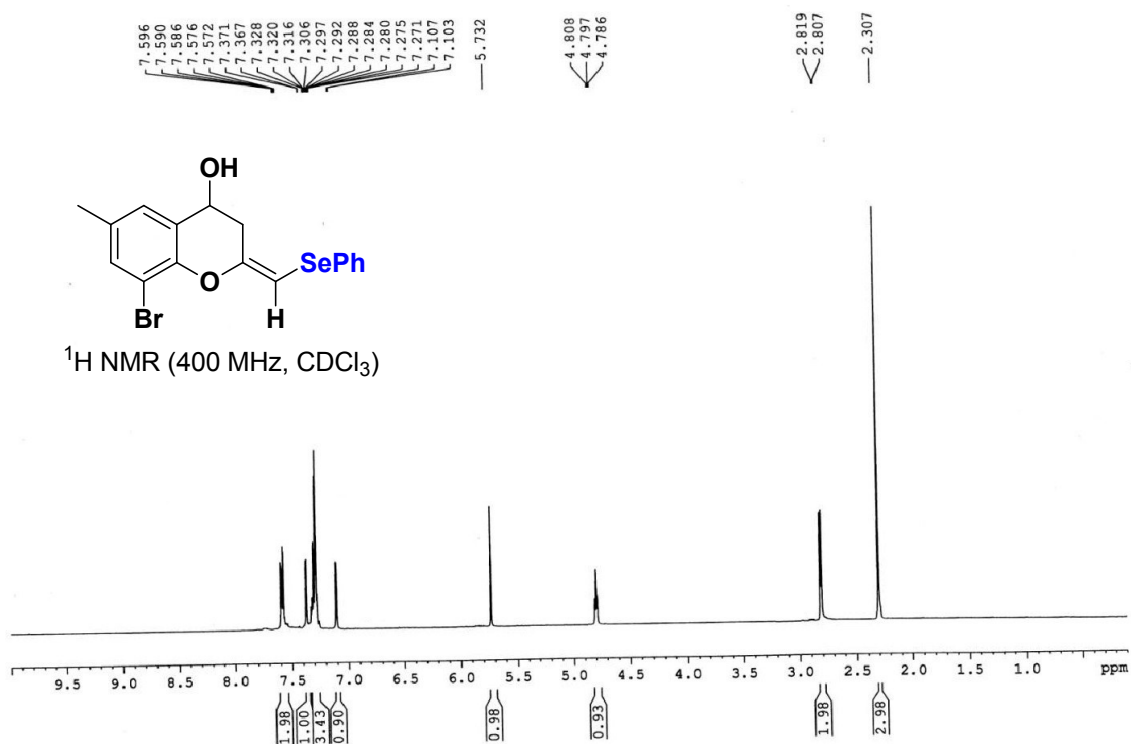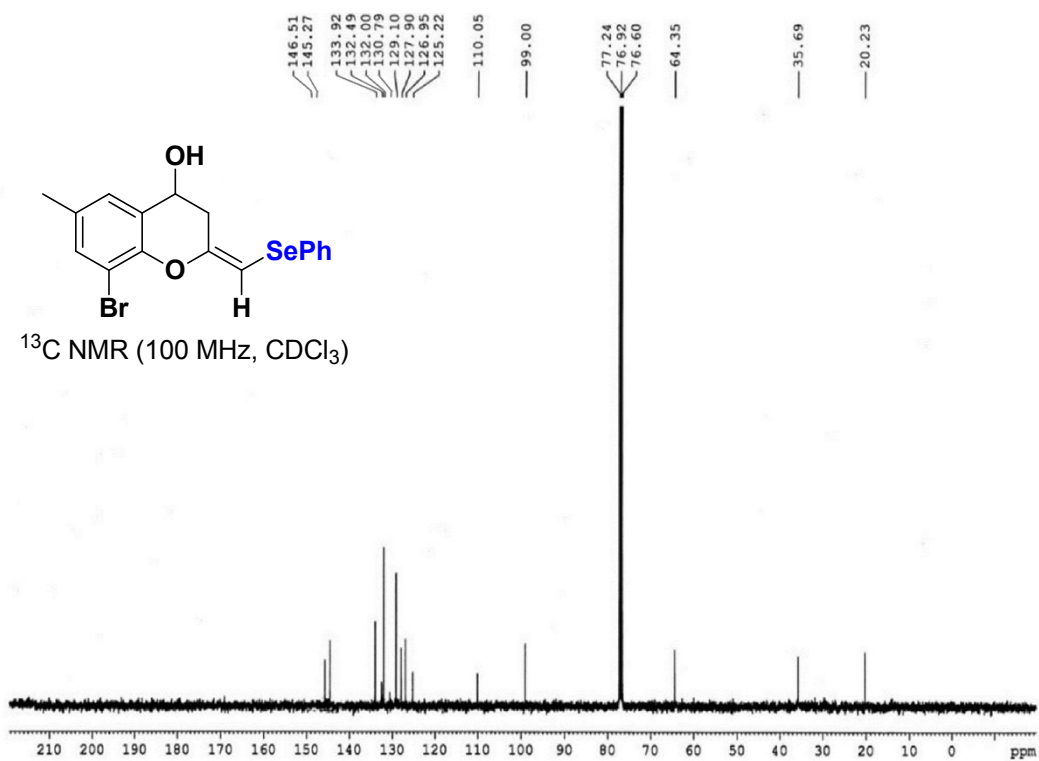



**(E)-6-bromo-2-((phenylselanyl)methylene)chroman-4-ol (4h)**

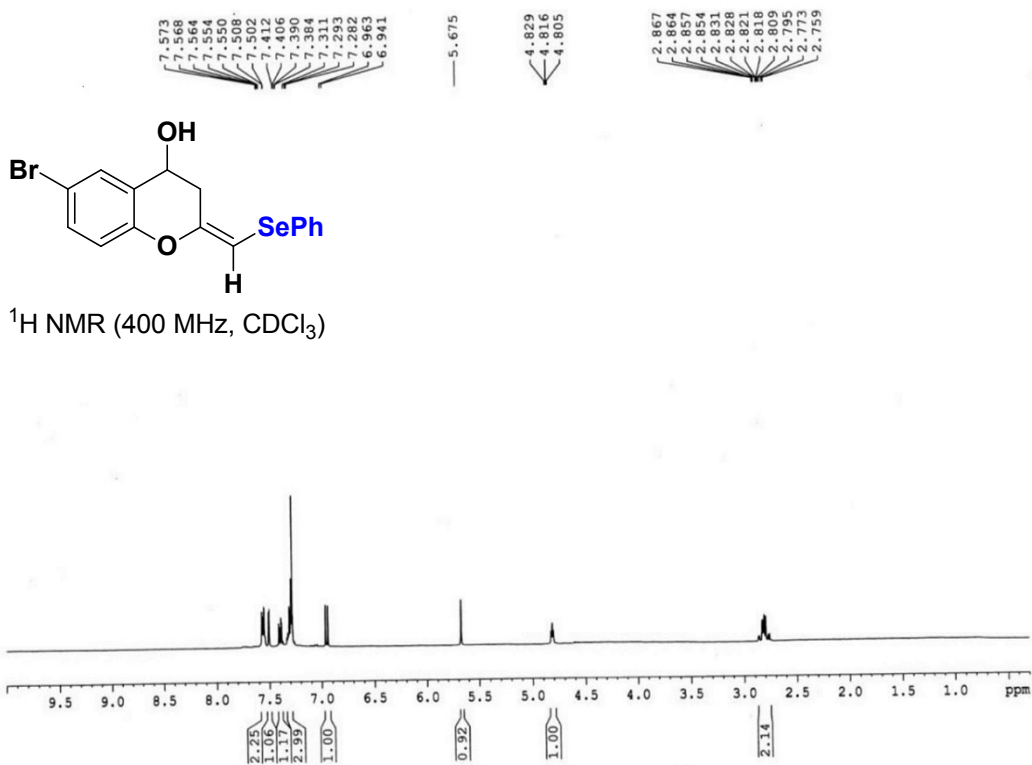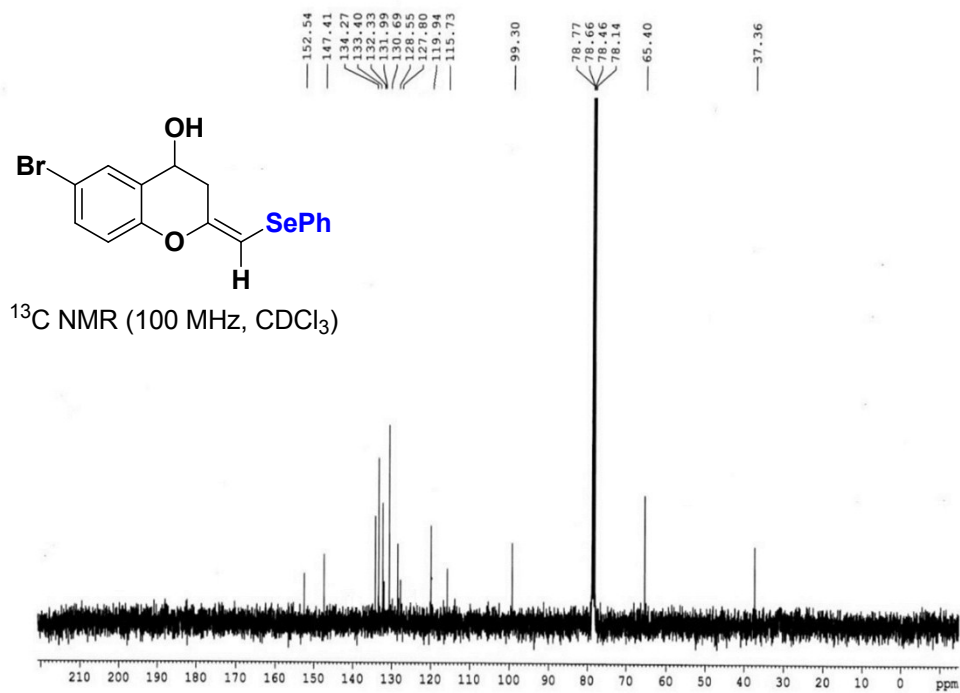

**(E)-6-chloro-2-((phenylselanyl)methylene)chroman-4-ol (4i)**

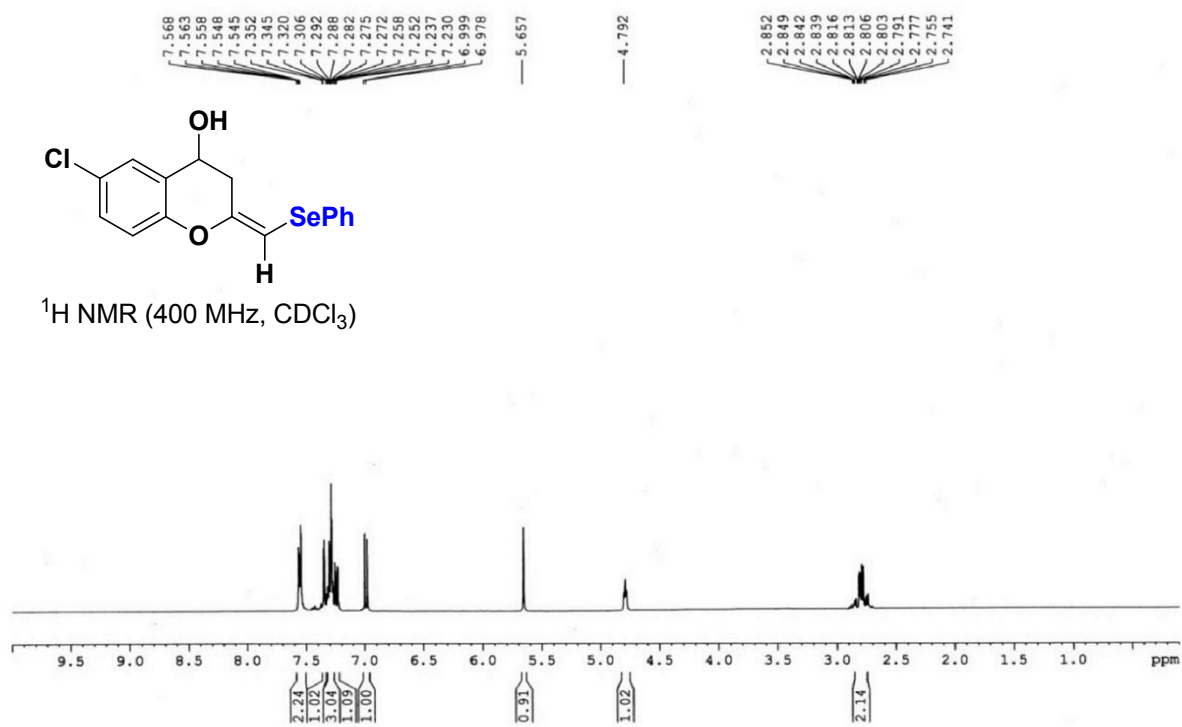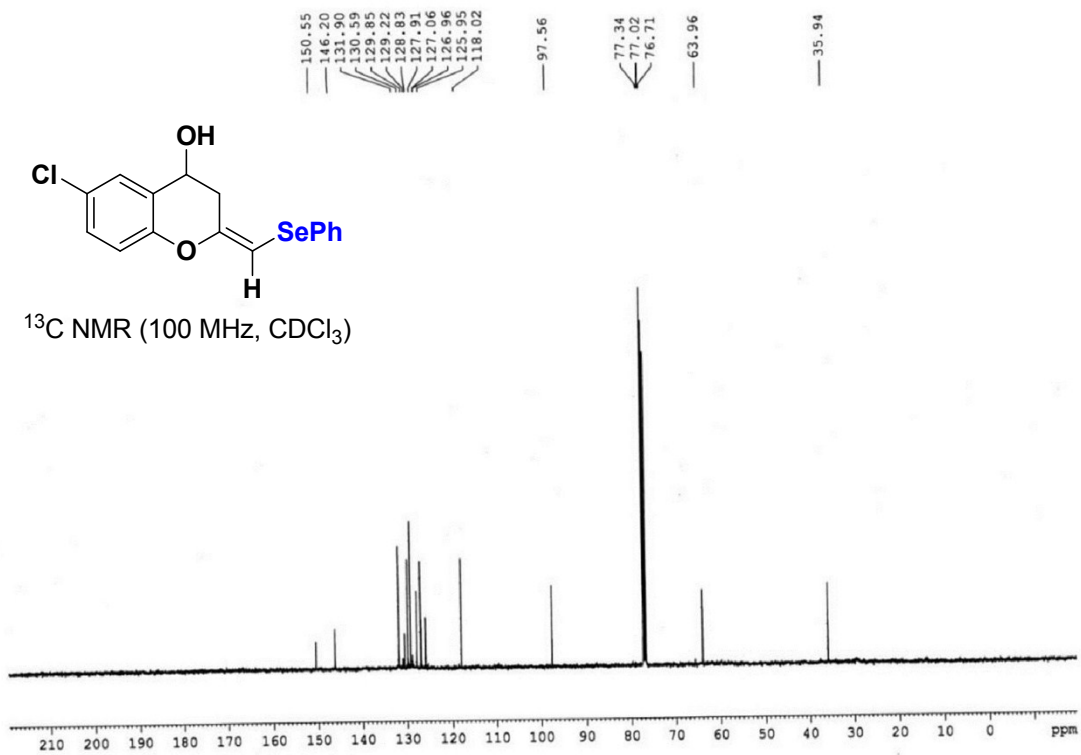

**(E)-2-((phenylselanyl)methylene)-6-(trimethylsilyl)chroman-4-ol (4j)**

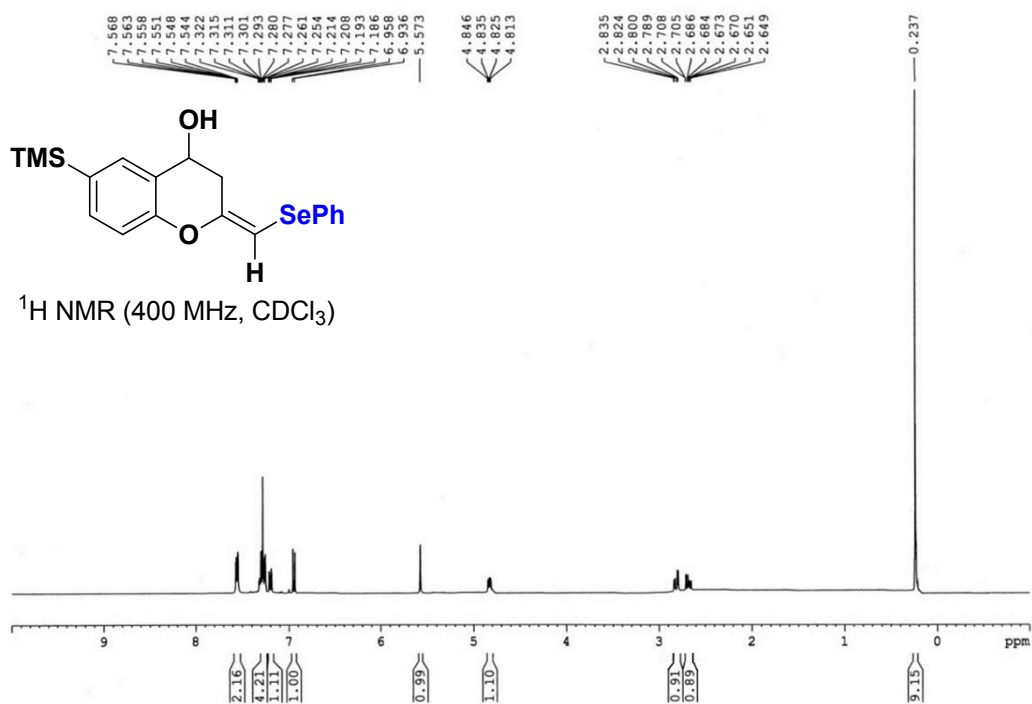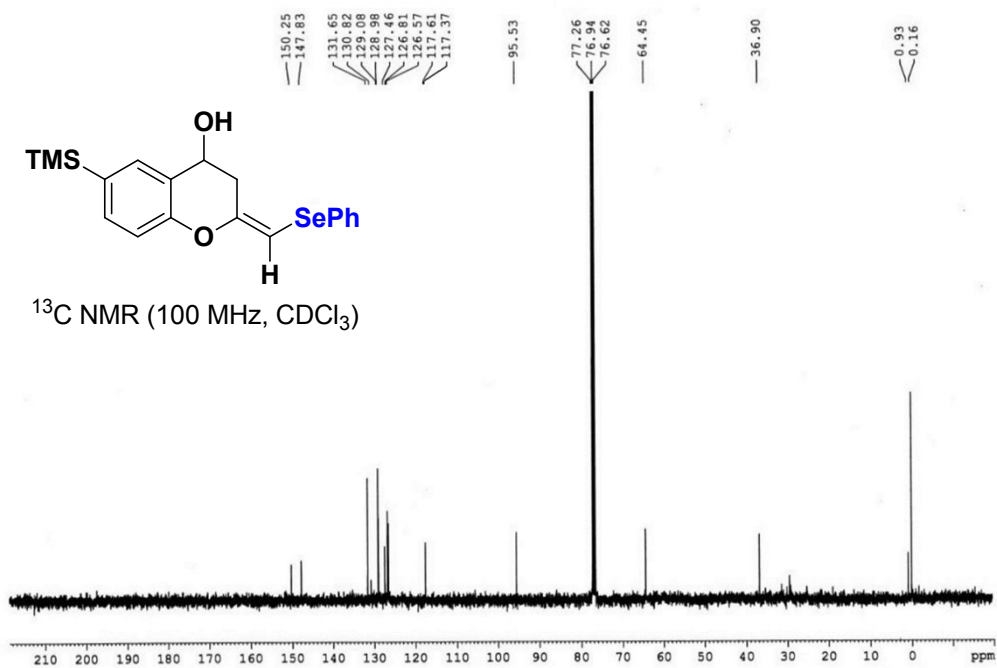

**(E)-4-methyl-2-((phenylselanyl)methylene)chroman-4-ol (4k)**

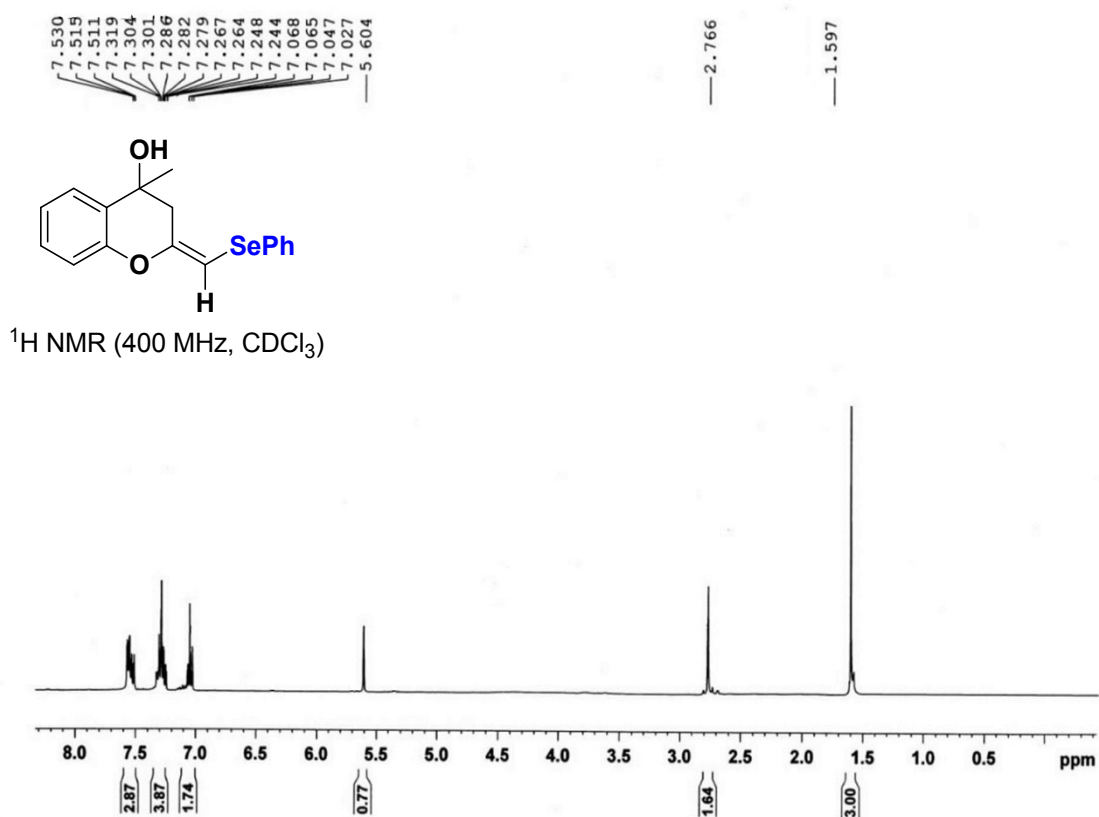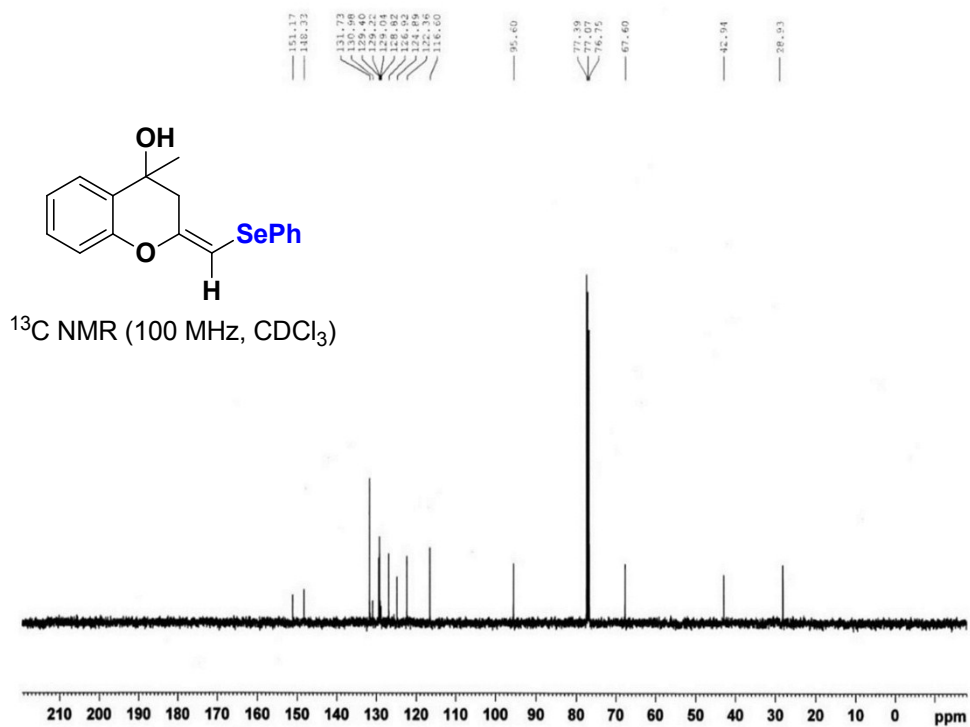

**(E)-4,8-dimethyl-2-((phenylselanyl)methylene)chroman-4-ol (4l)**

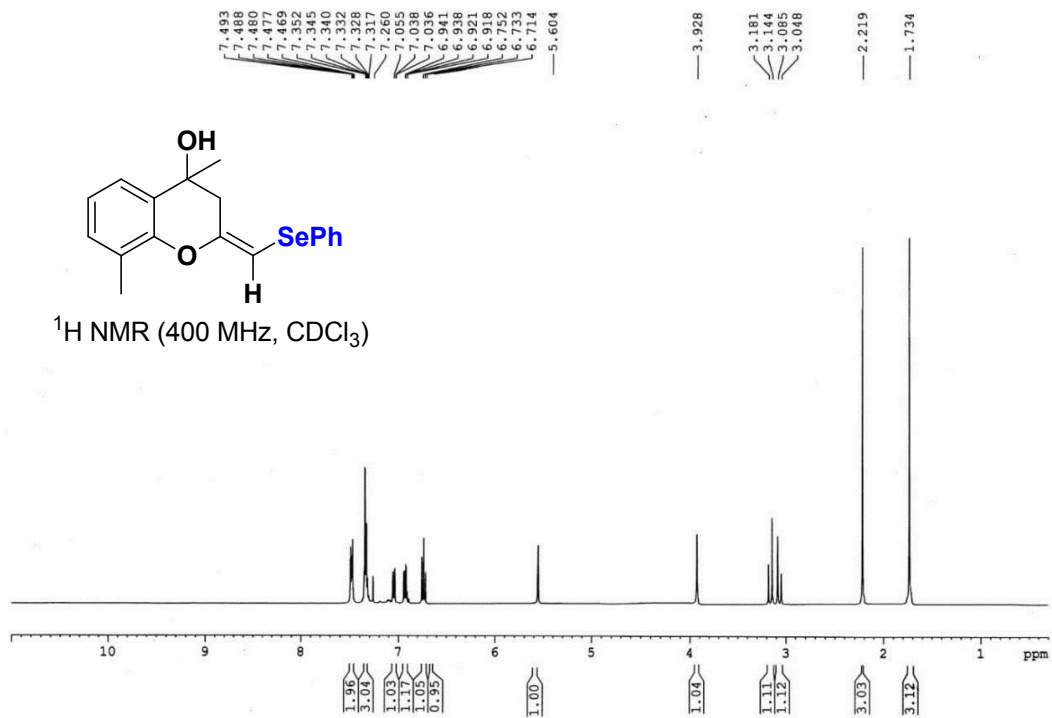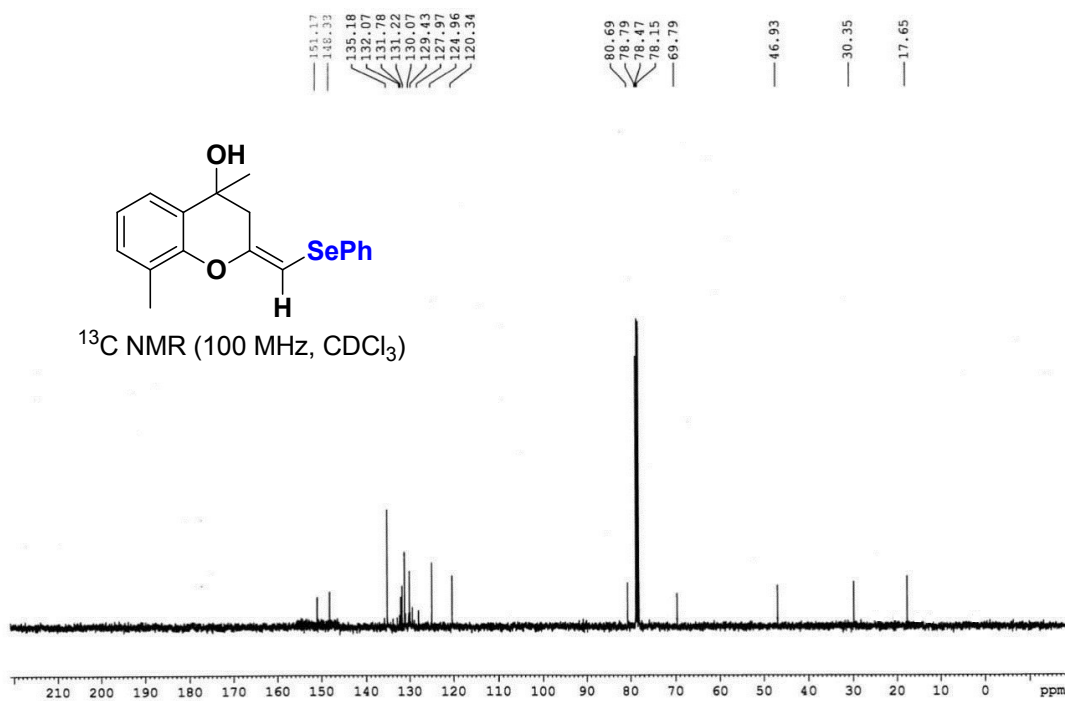

**(E)-6-bromo-4-methyl-2-((phenylselanyl)methylene)chroman-4-ol (4m)**

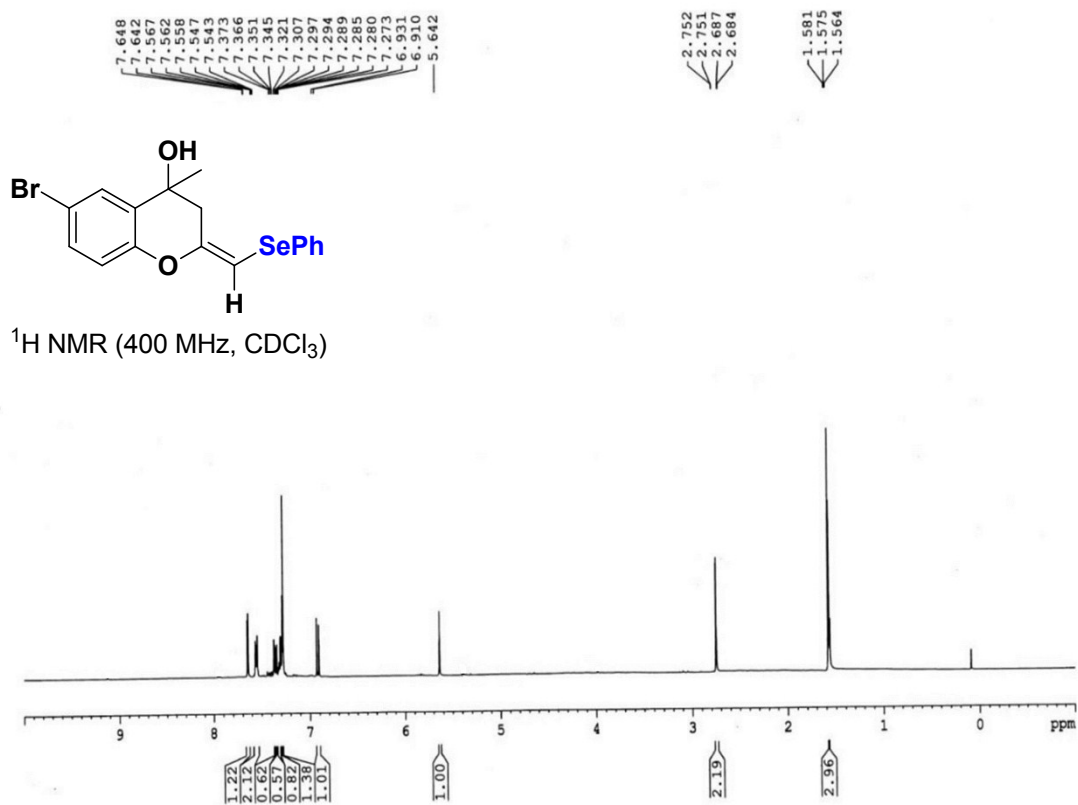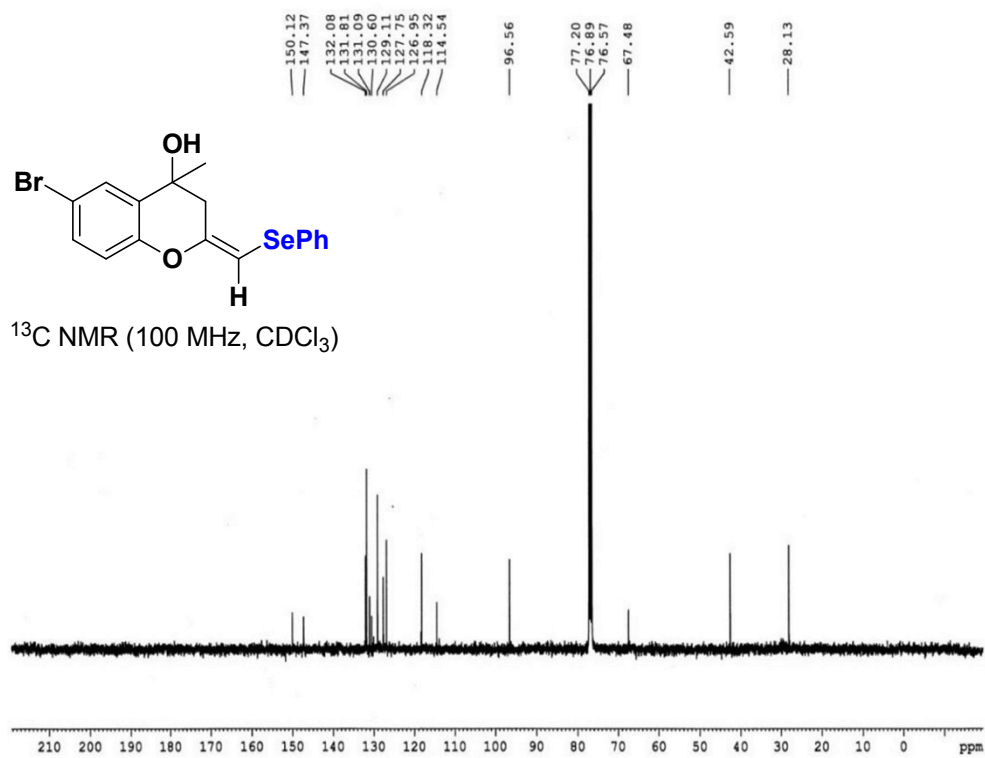

**(E)-6-(tert-butyl)-2-((phenylselanyl)methylene)chroman-4-ol (4n)**

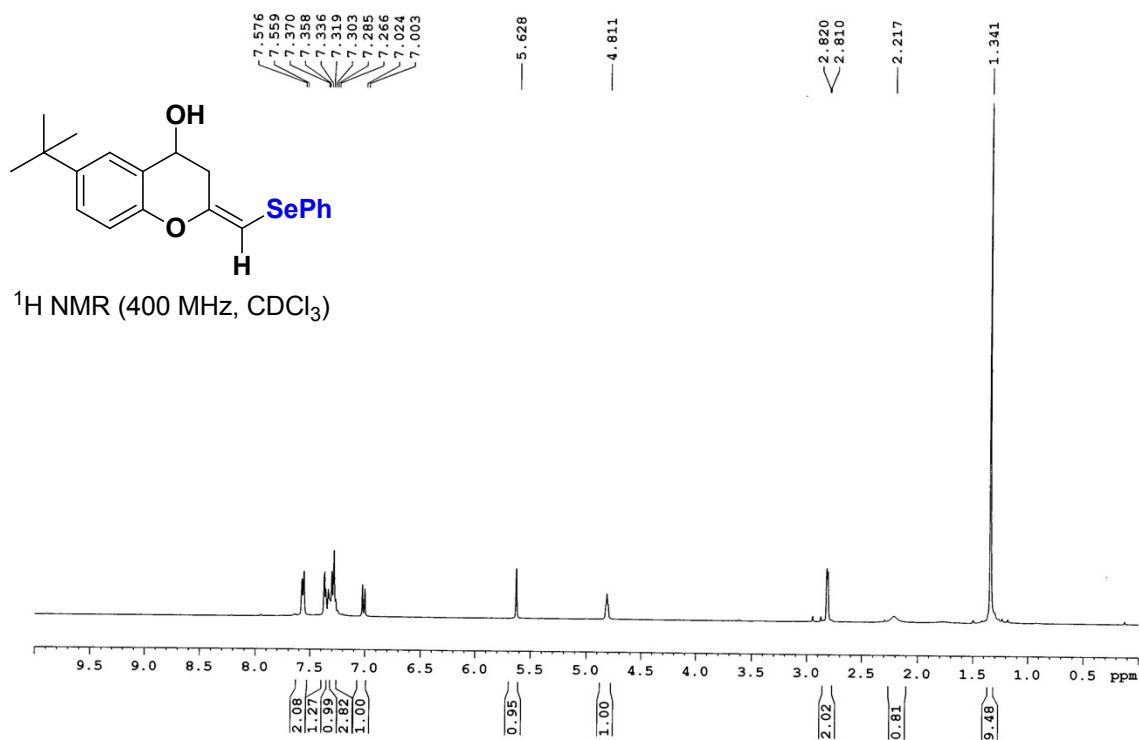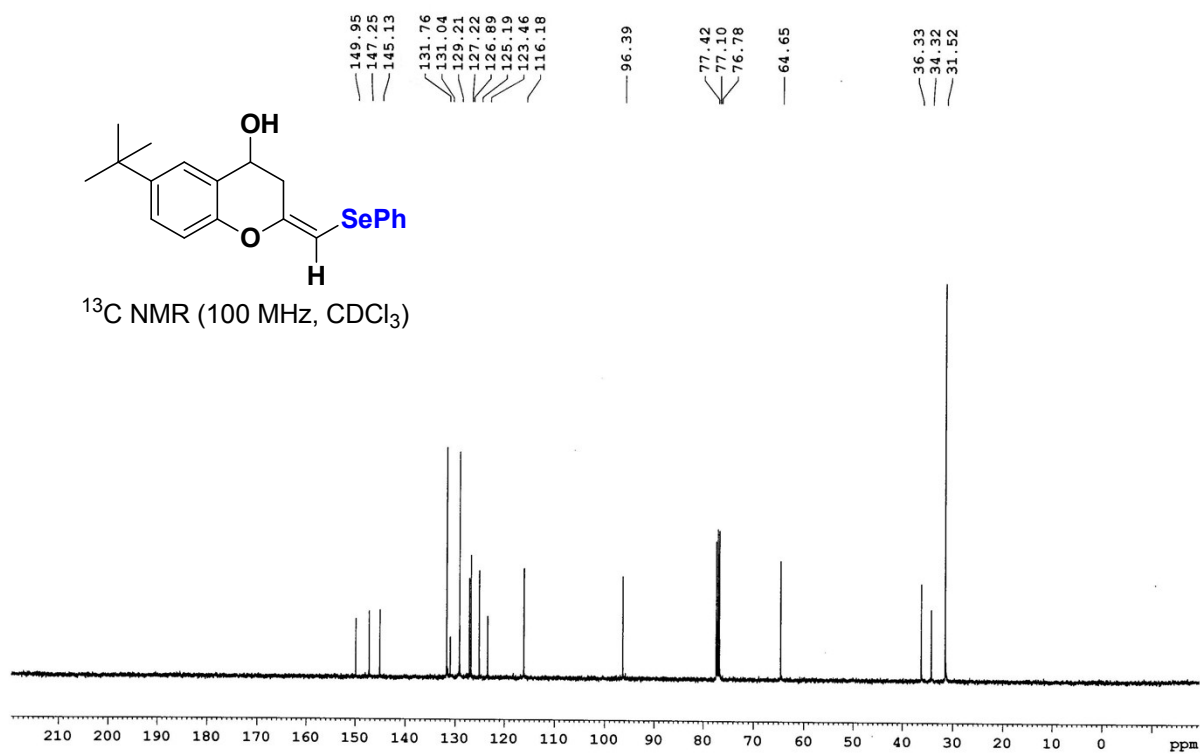

**(E)-6-bromo-8-methoxy-2-((phenylselanyl)methylene)chroman-4-ol (4o)**

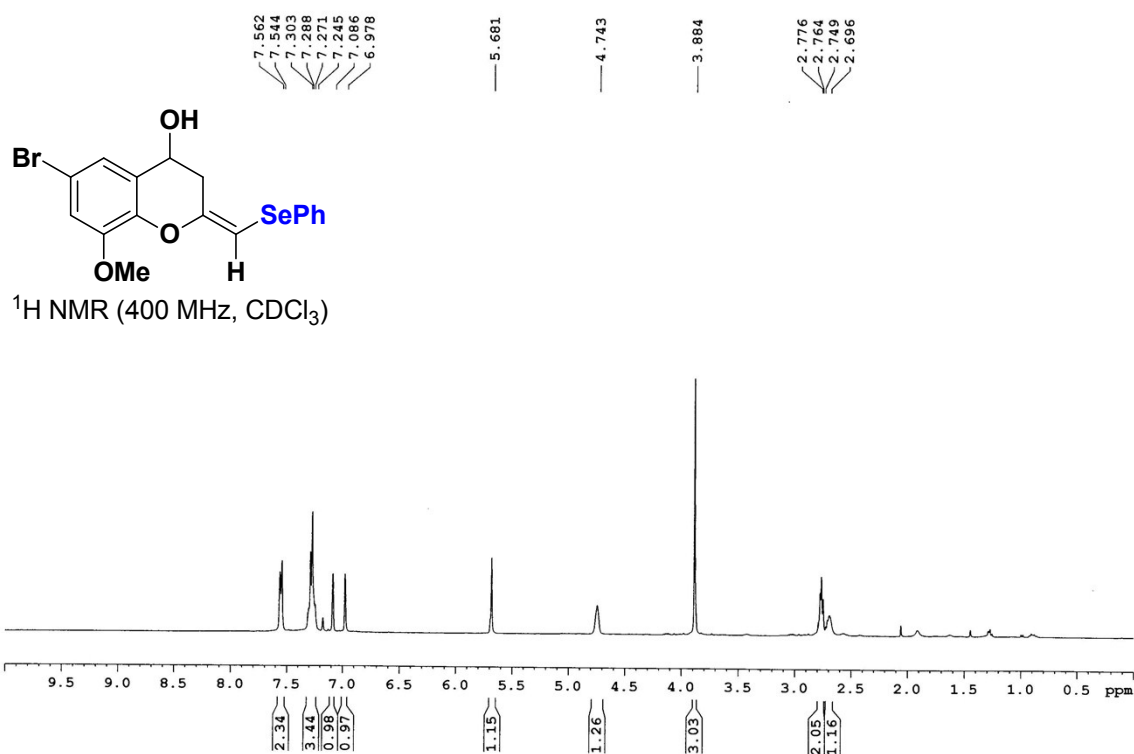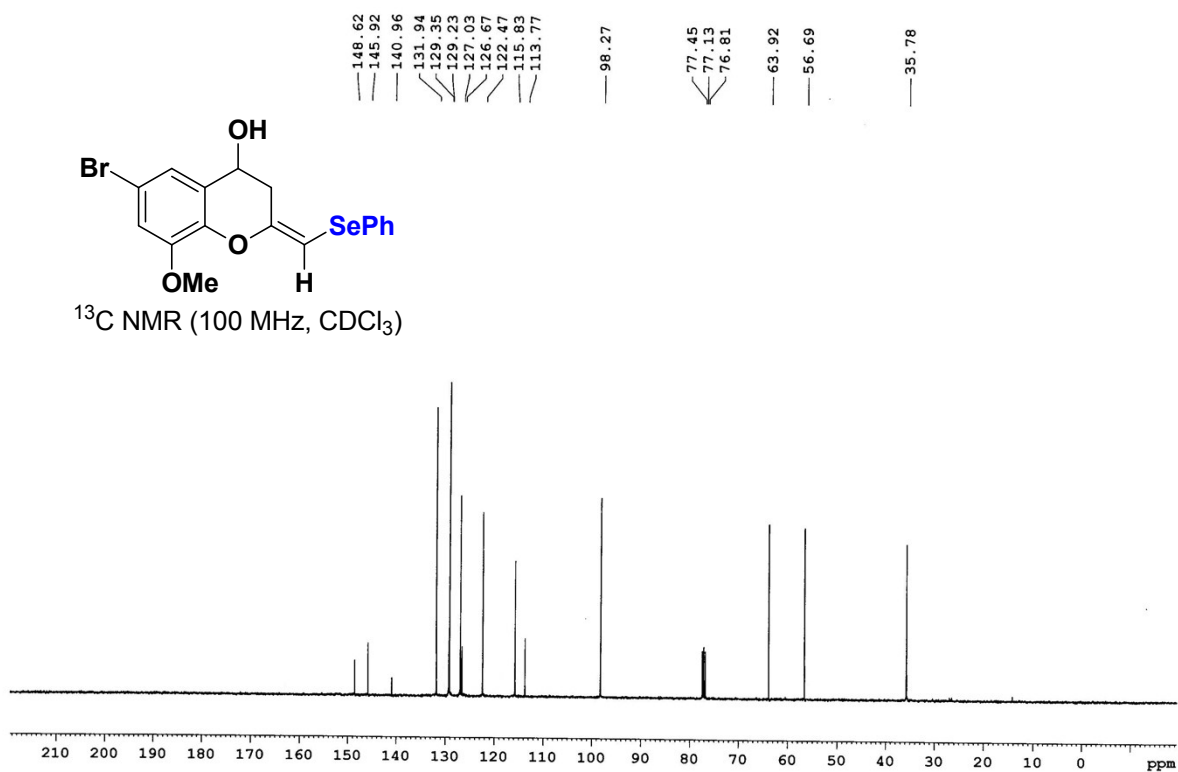



**(E)-8-methoxy-2-((phenylselanyl)methylene)chroman-4-ol (4p)**

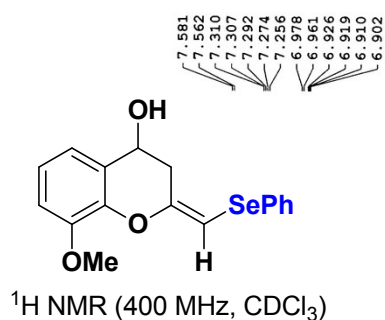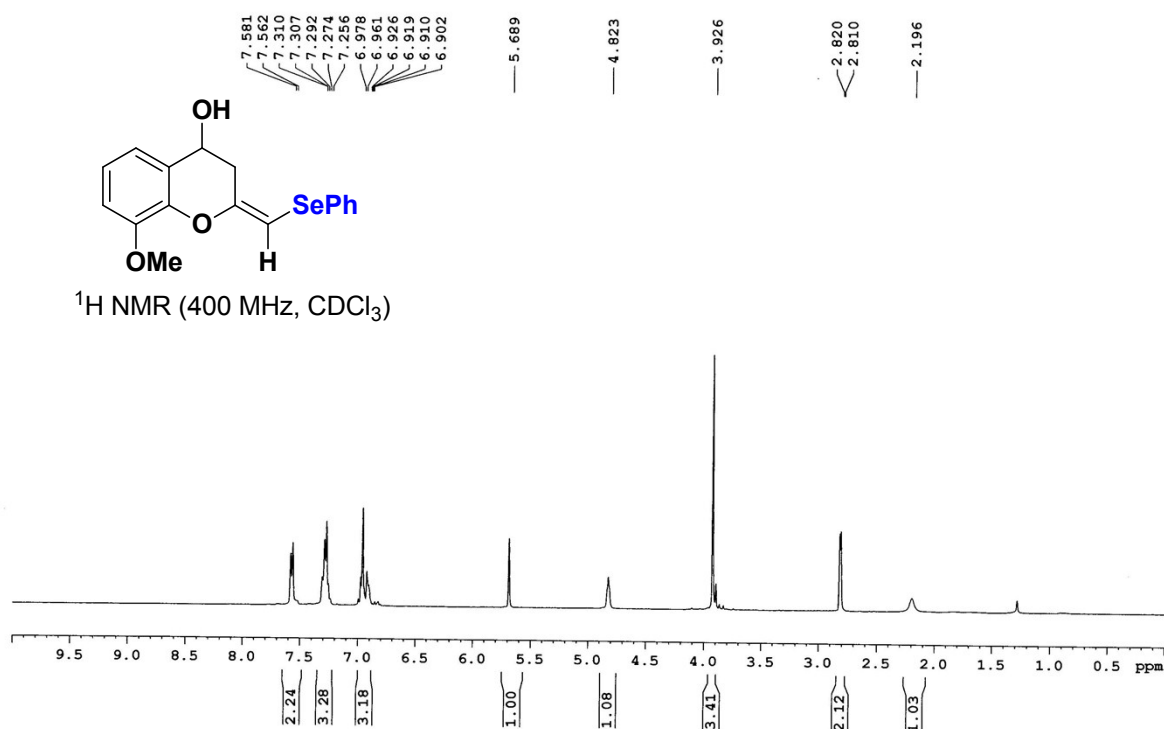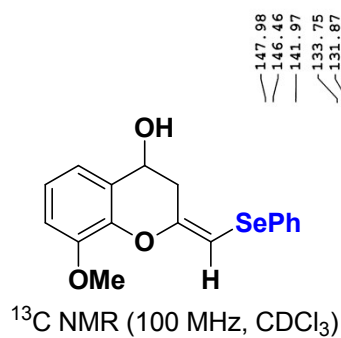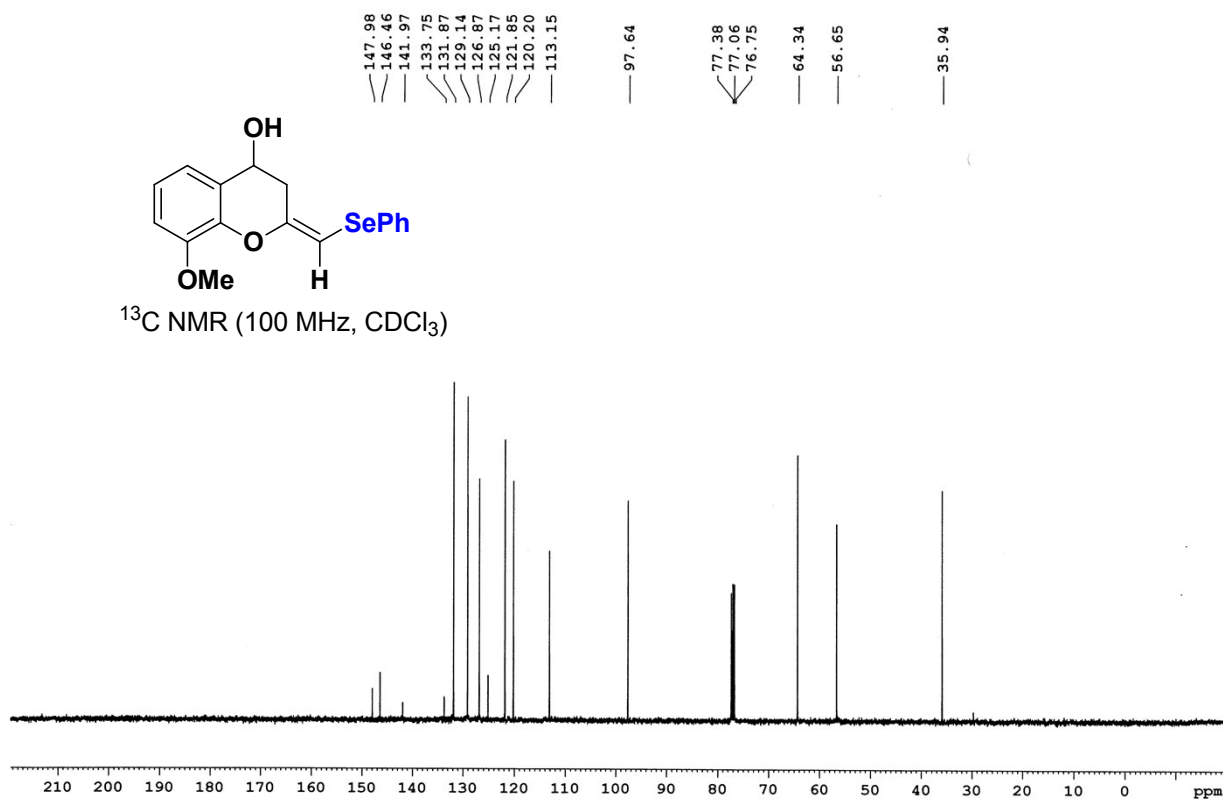

**(E)-2-(2-hydroxy-2-methyl-1-(phenylselanyl)propylidene)-8-methoxychroman-4-ol (4q)**

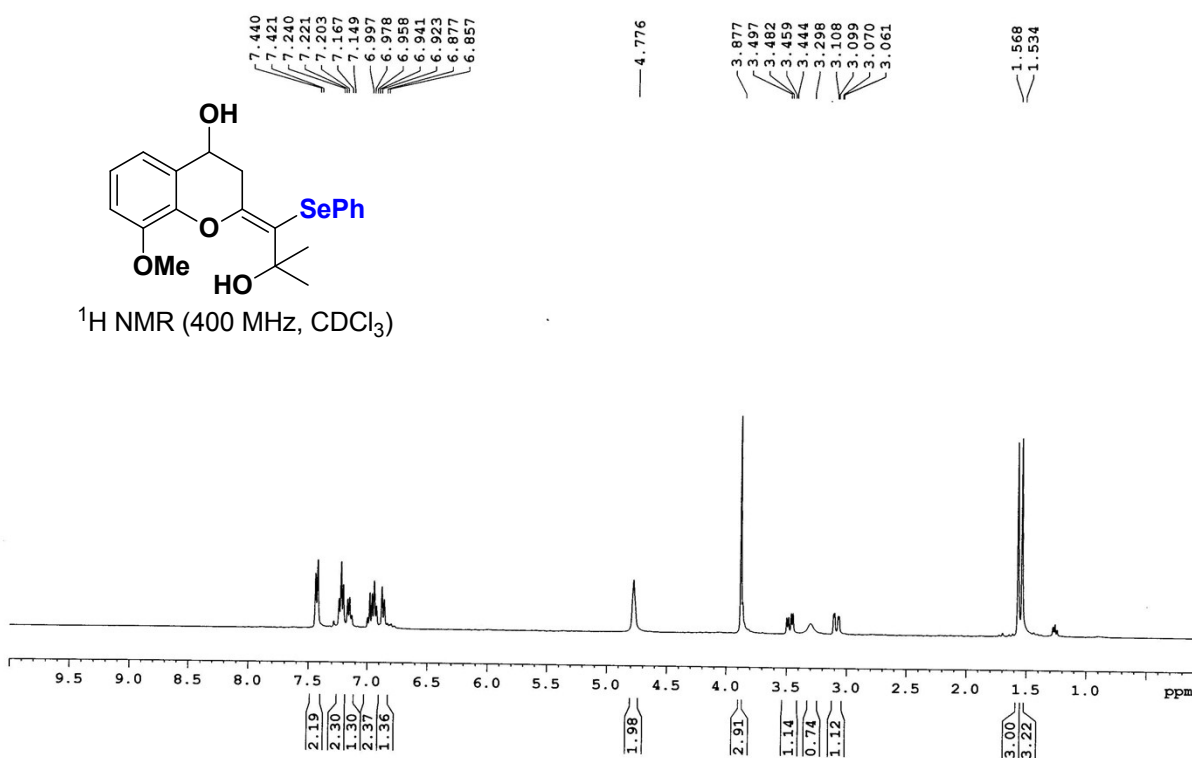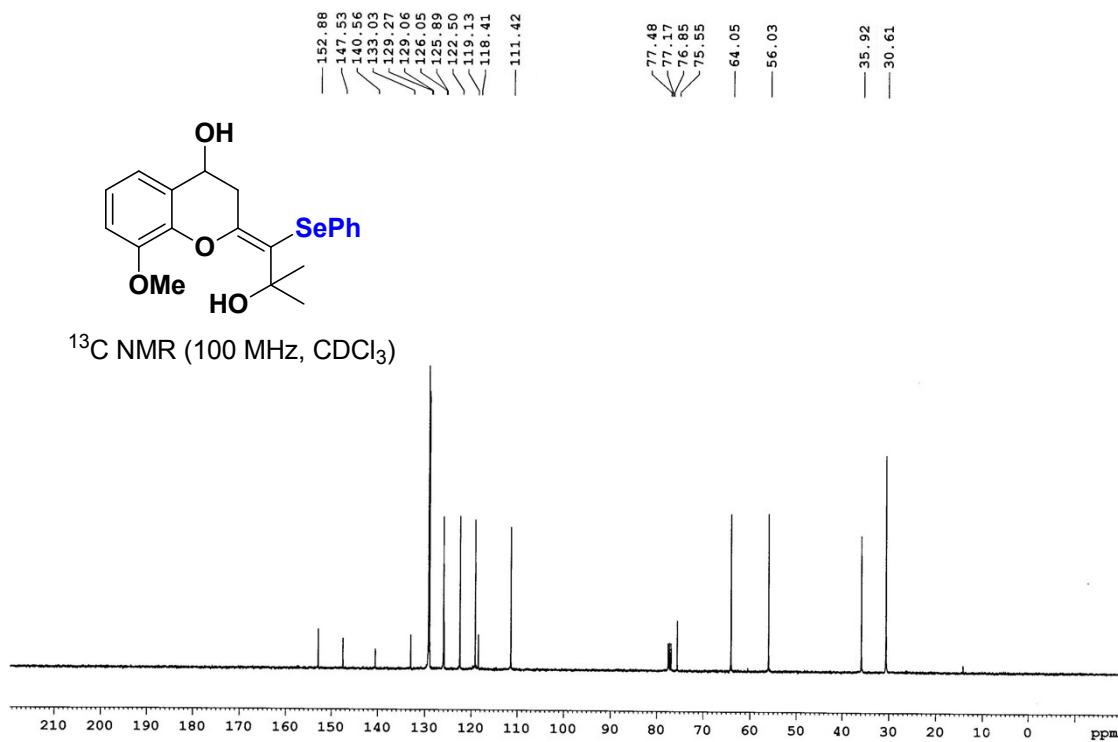

**(E)-2-(2-ethyl-2-hydroxy-1-(phenylselanyl)butylidene)-8-methoxychroman-4-ol (4r)**

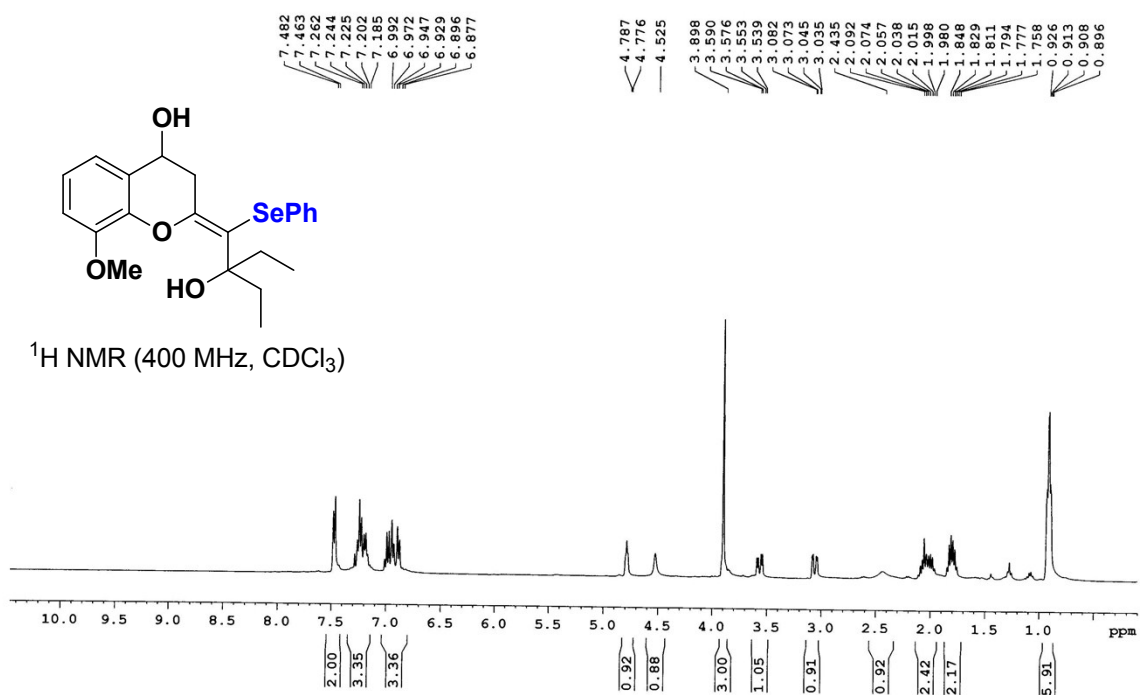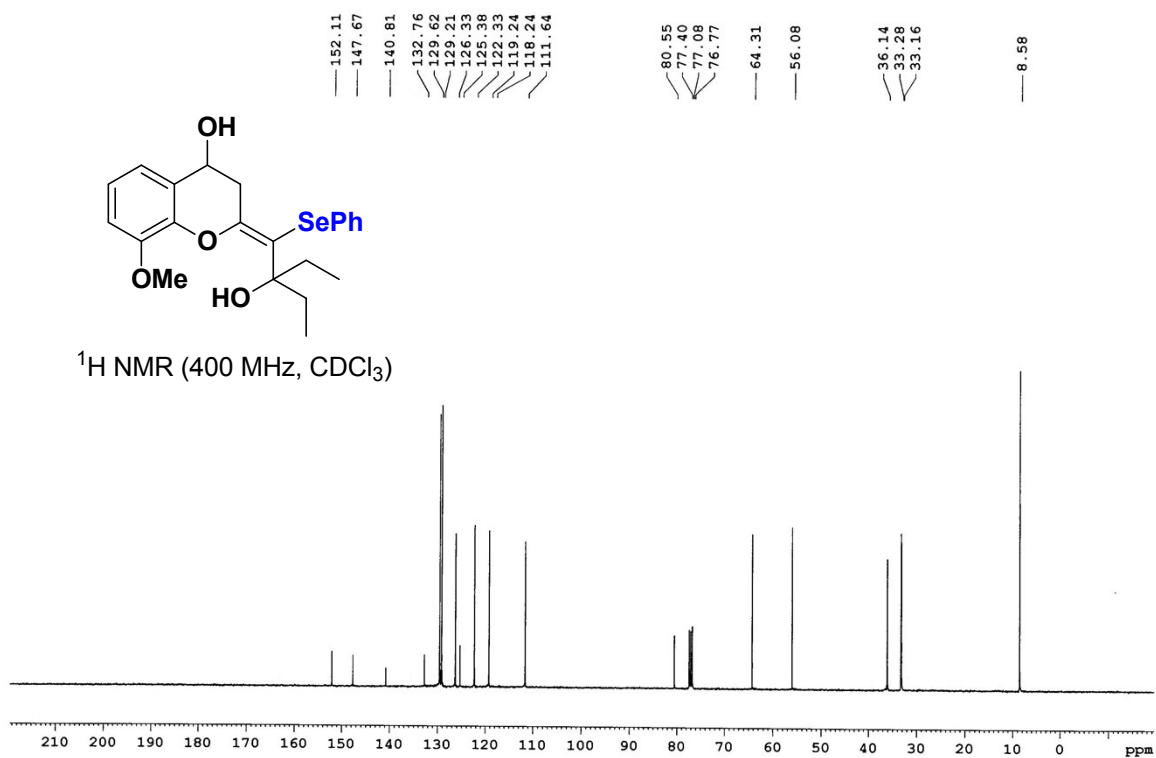

**(E)-2-(2-hydroxy-1-(phenylselanyl)propylidene)-8-methoxychroman-4-ol (4s)**

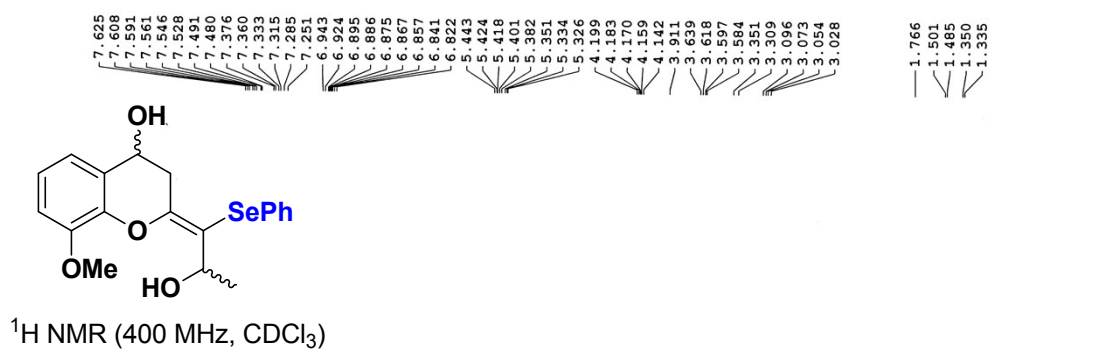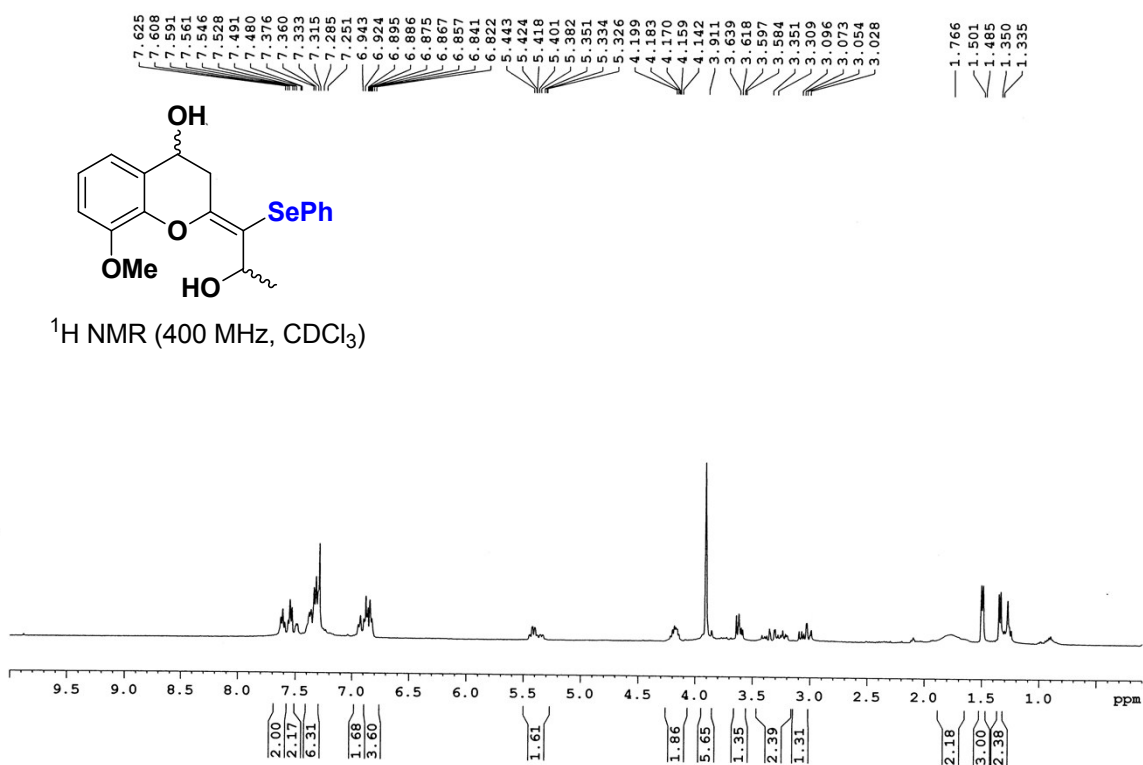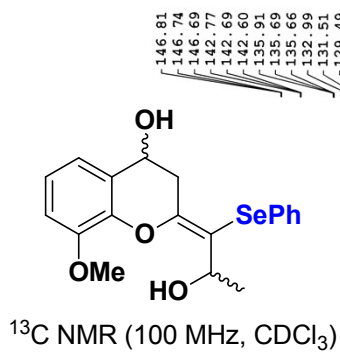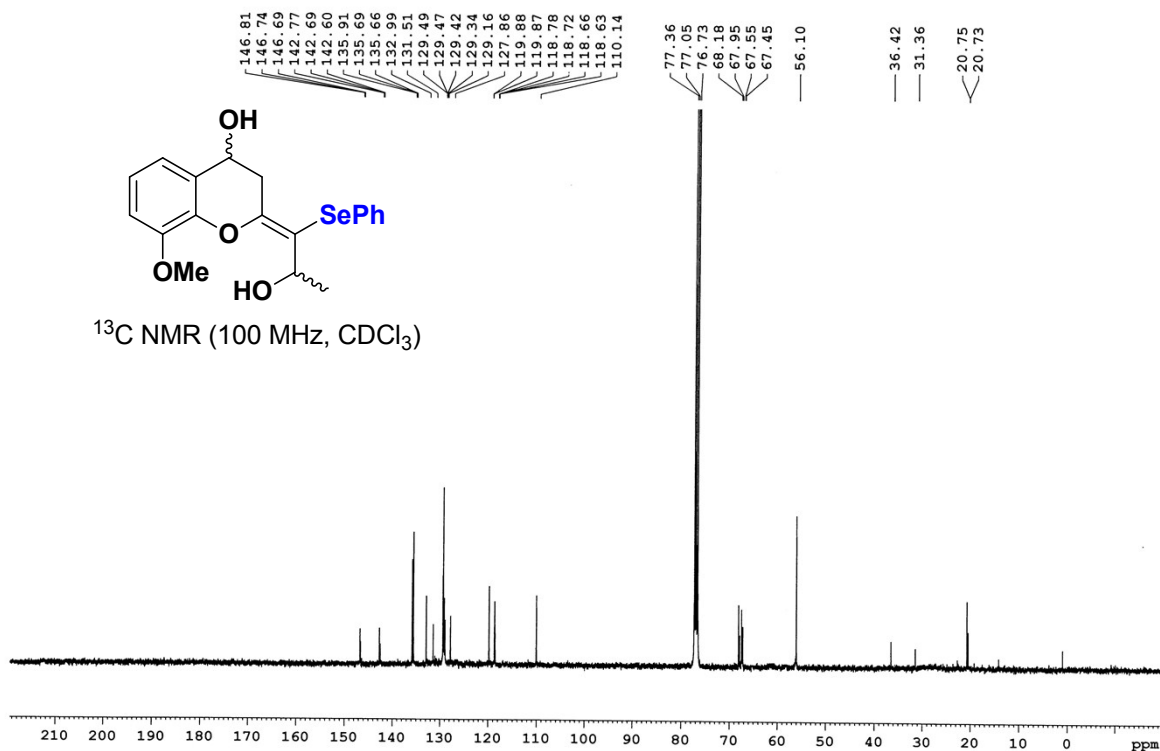

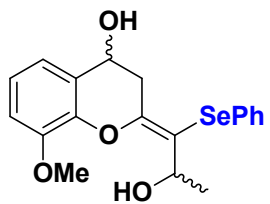

$^{77}\text{Se}$  NMR (76 MHz,  $\text{CDCl}_3$ )

381.35  
381.14  
333.14  
332.92

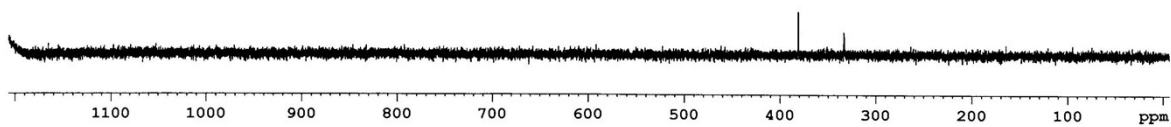

**(E)-2-((m-tolylselanyl)methylene)chroman-4-ol (4t)**

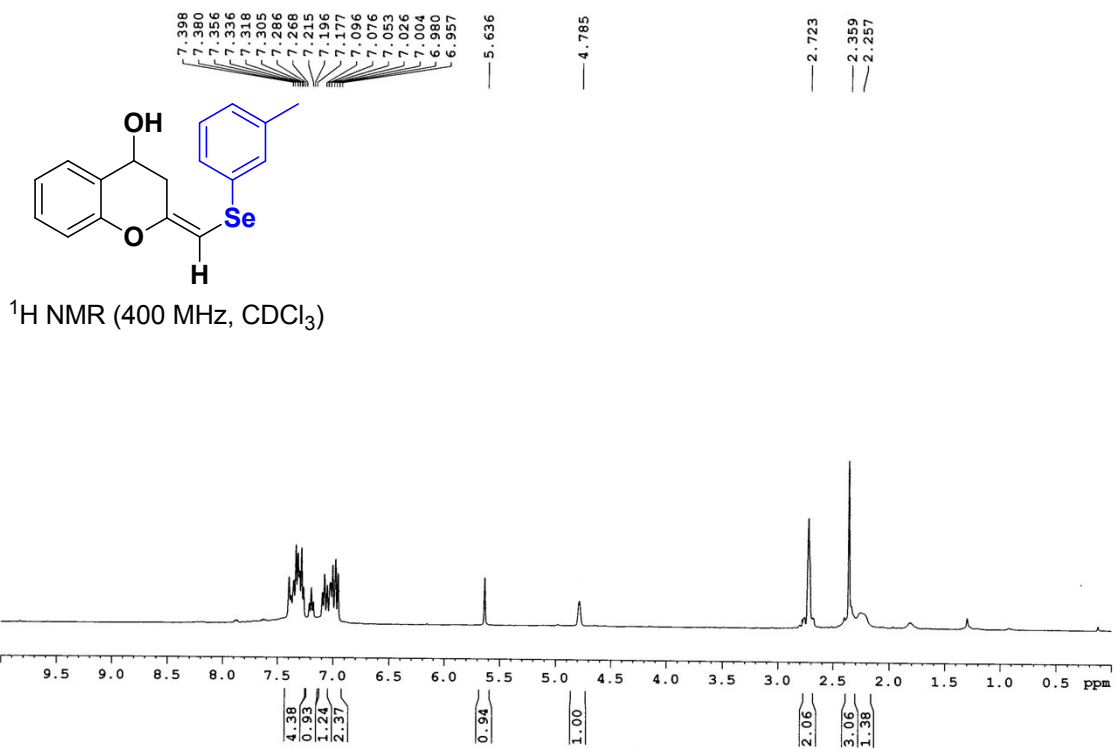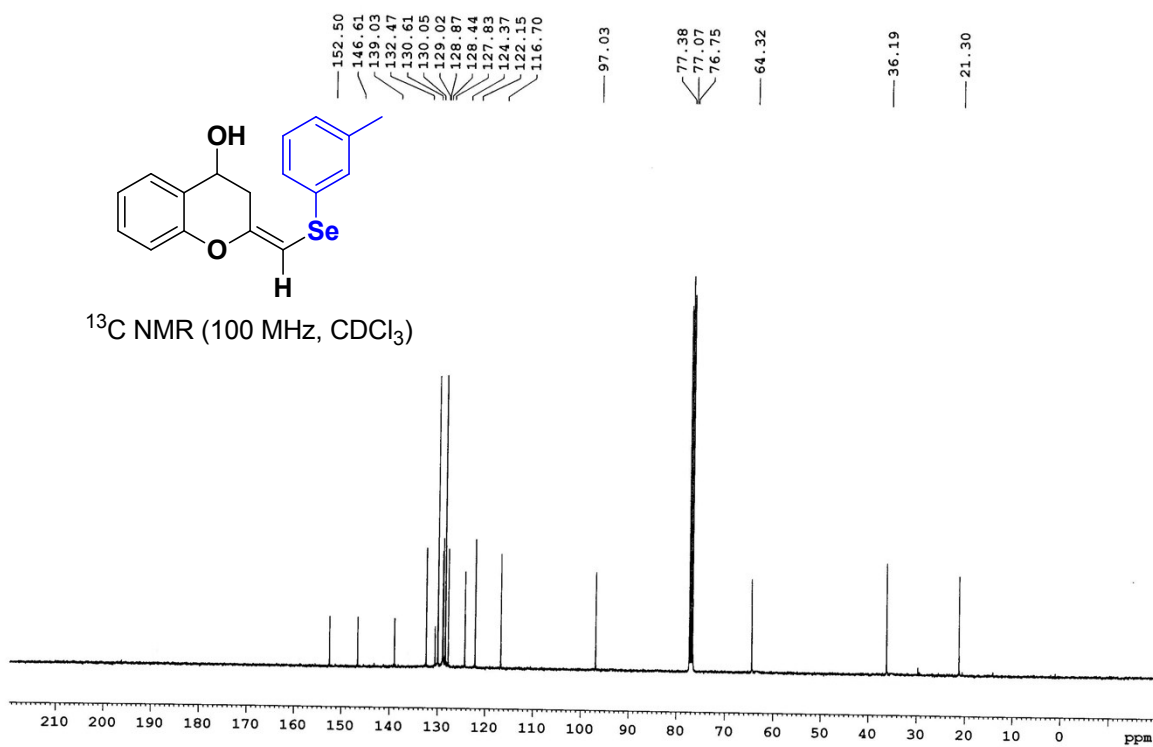

**(E)-2-(((3-methoxyphenyl)selenyl)methylene)chroman-4-ol (4u)**

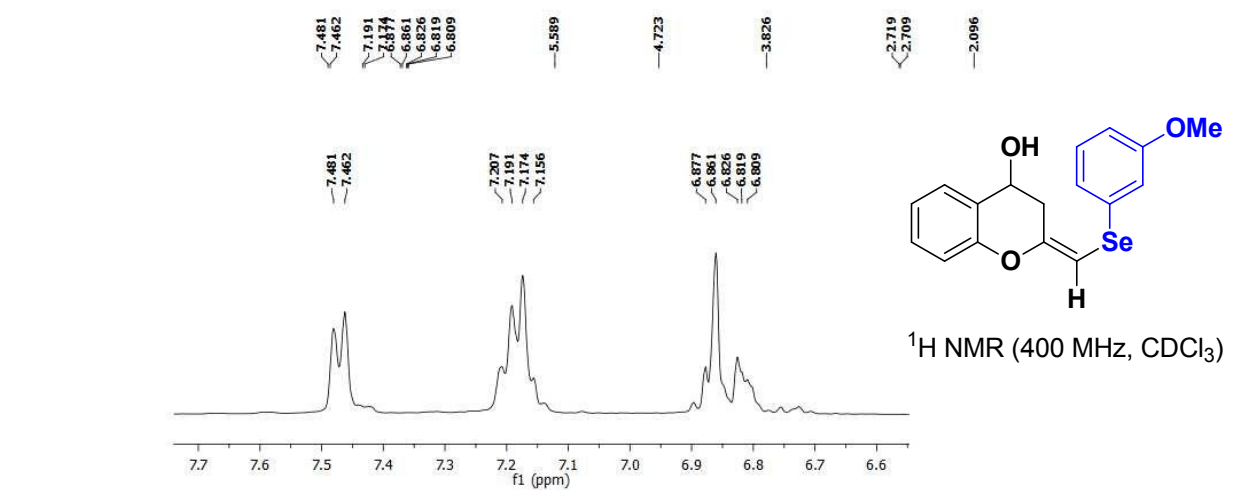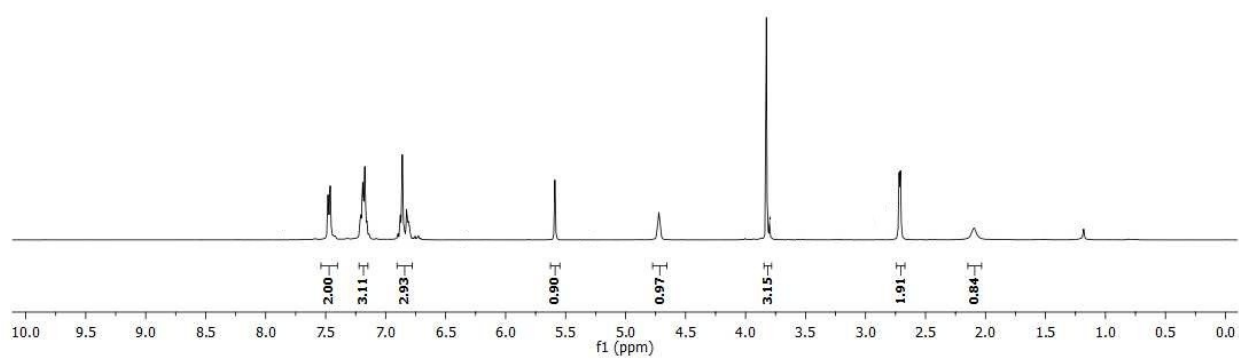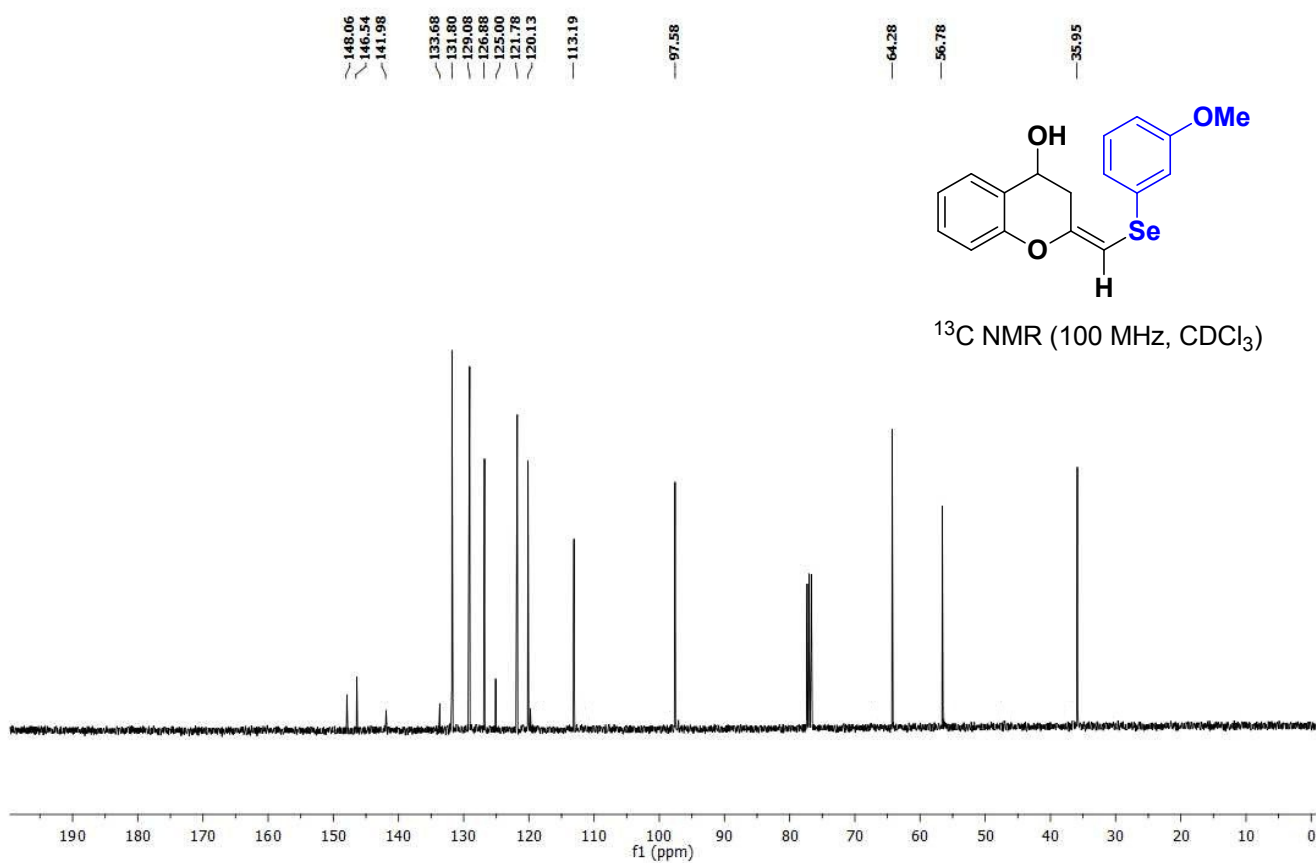

**(E)-2-(((3-bromophenyl)selenyl)methylene)chroman-4-ol (4v)**

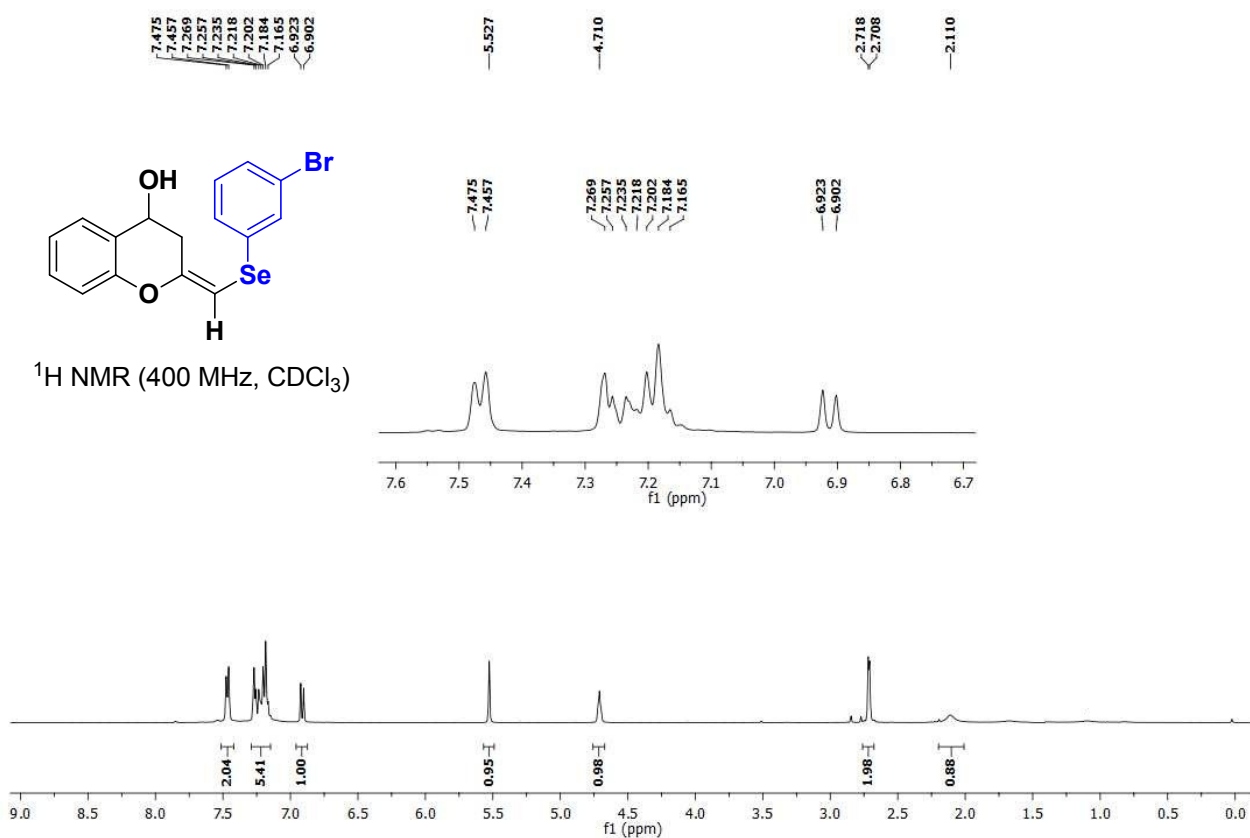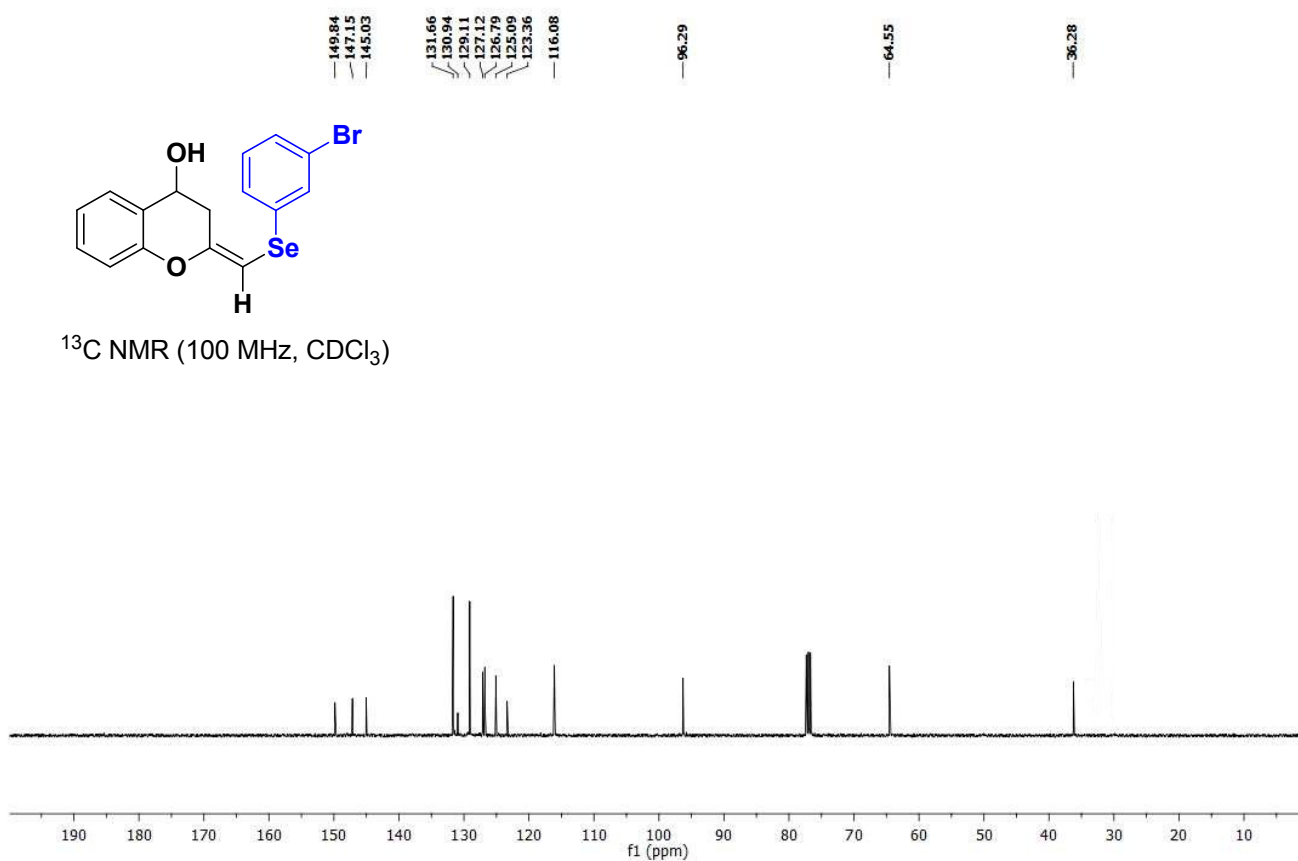



**(E)-2-(phenyl(phenylselanyl)methylene)benzofuran-3(2H)-one (5a)**

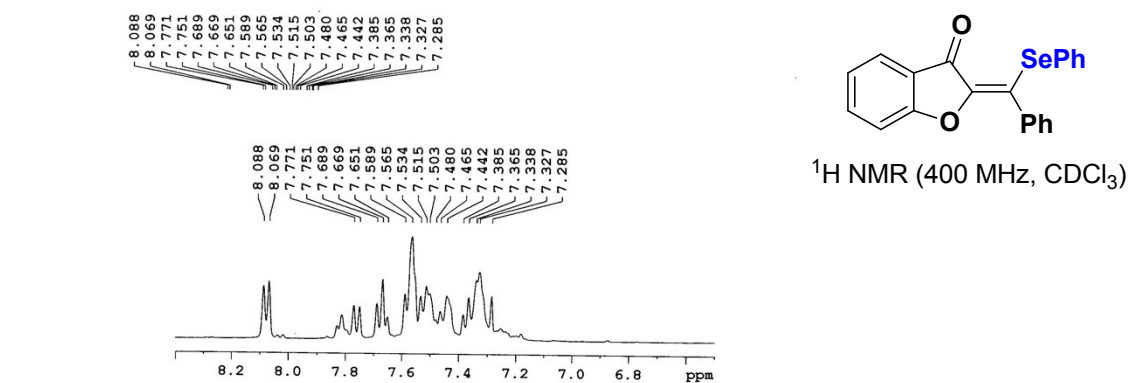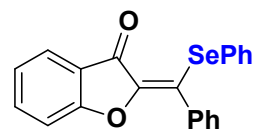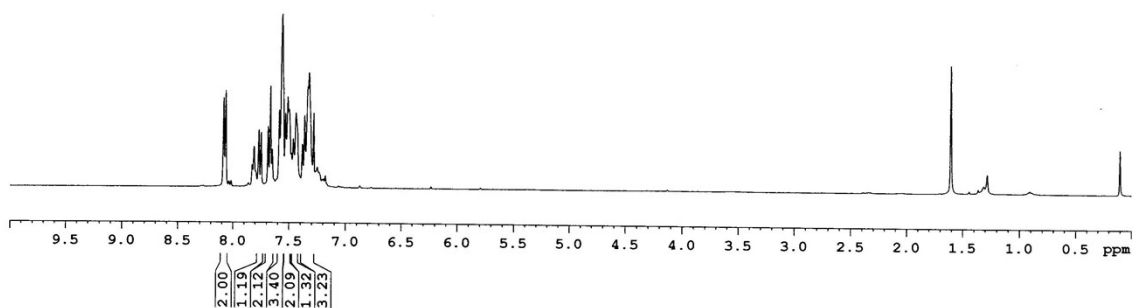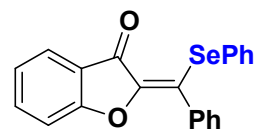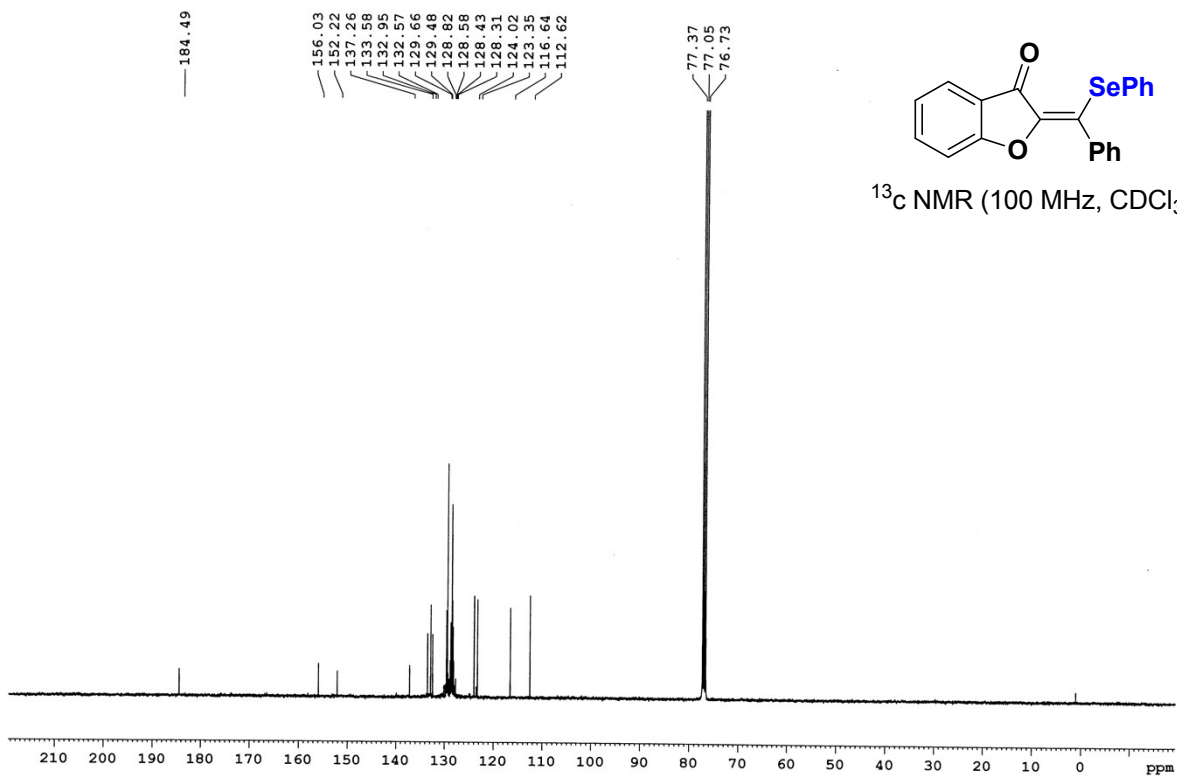

**(E)-7-bromo-5-methyl-2-(phenyl(phenylselanyl)methylene)benzofuran-3(2H)-one (5b)**

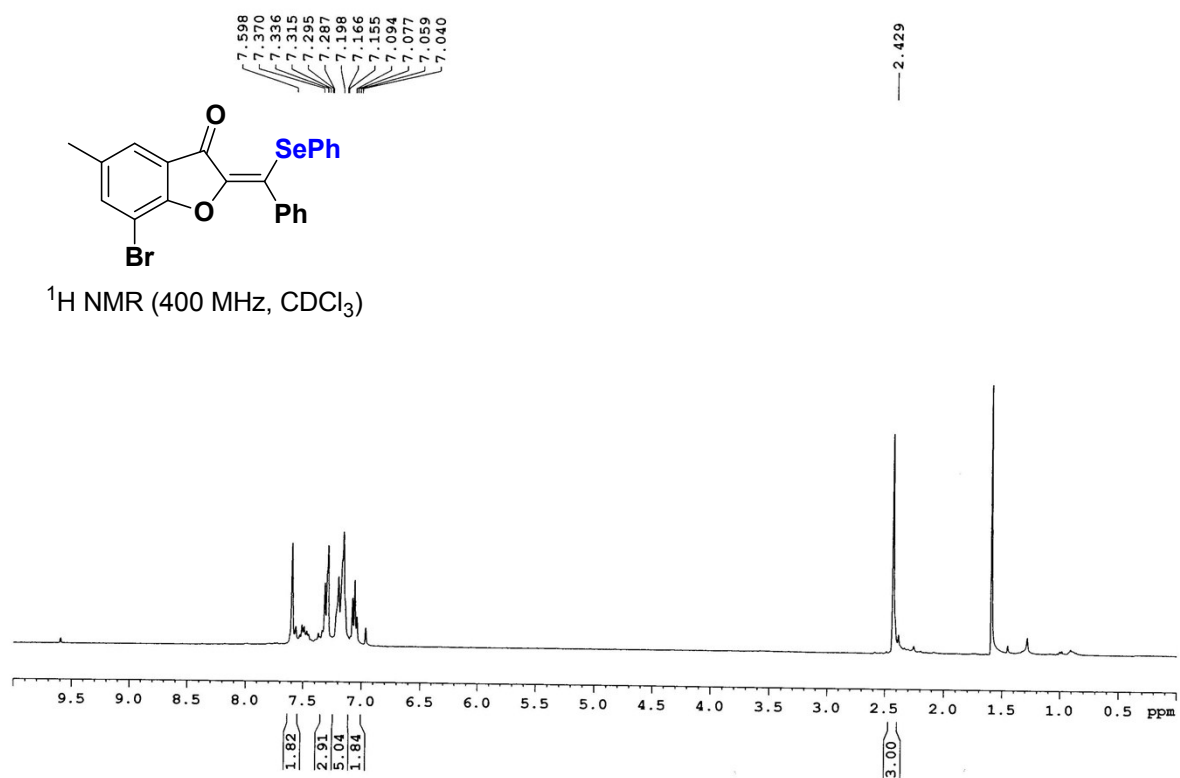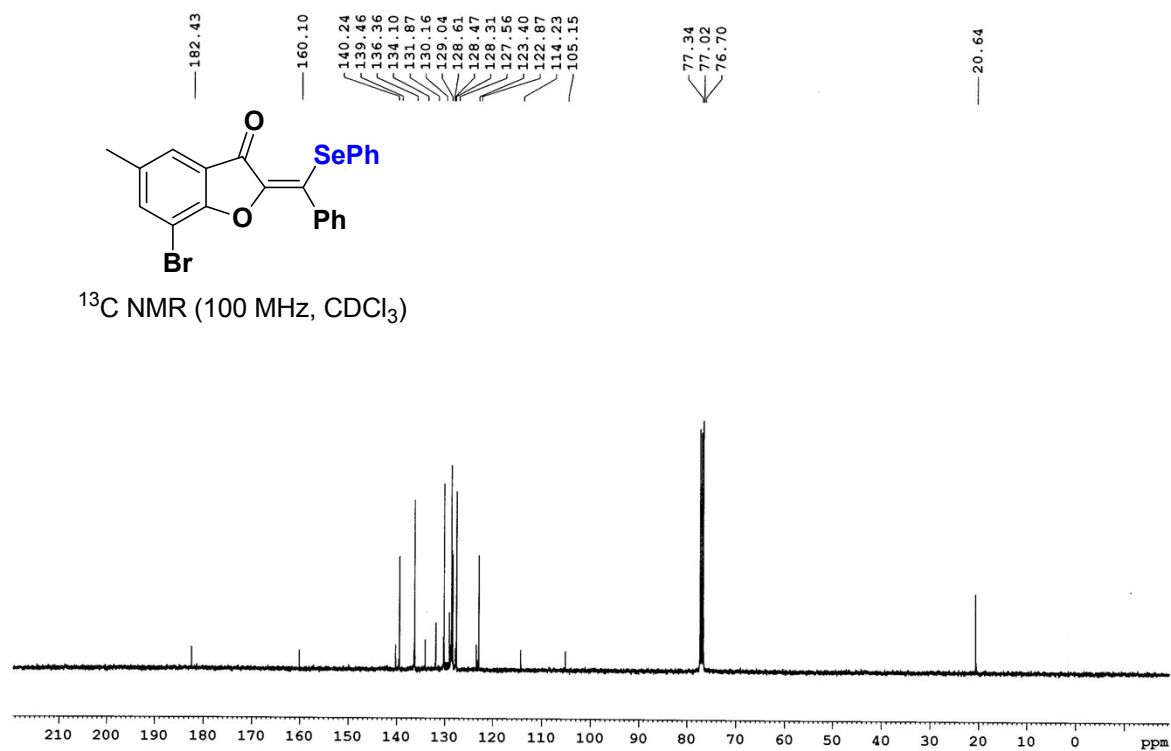

**(E)-7-methoxy-2-(phenyl(phenylselanyl)methylene)benzofuran-3(2H)-one (5c)**

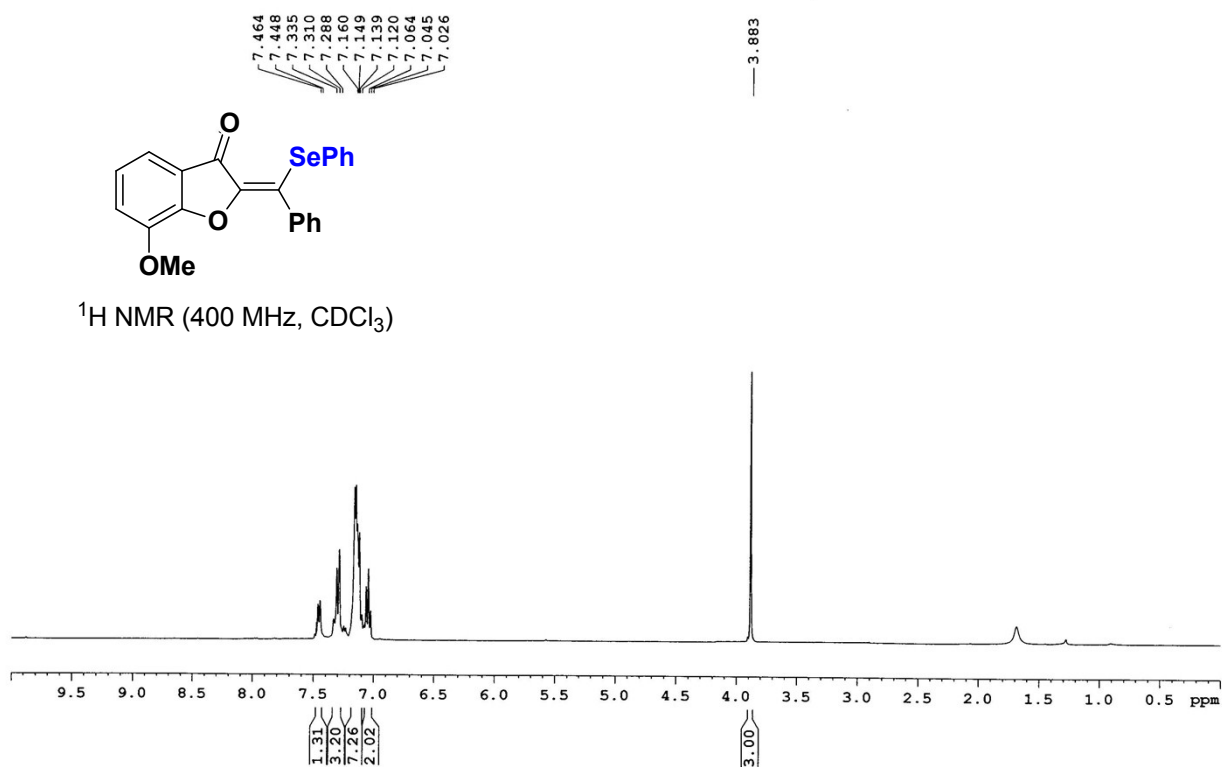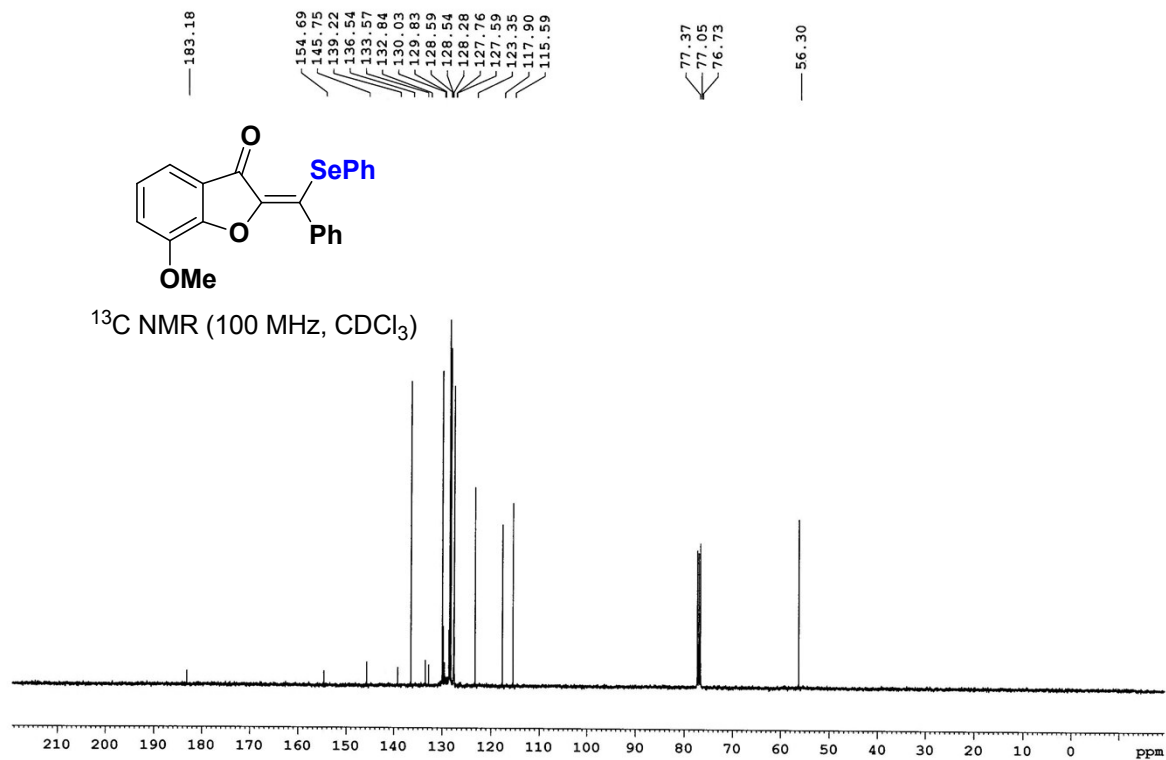

**(E)-2-(phenyl(phenylselanyl)methylene)naphtho[2,1-b]furan-1(2H)-one (5d)**

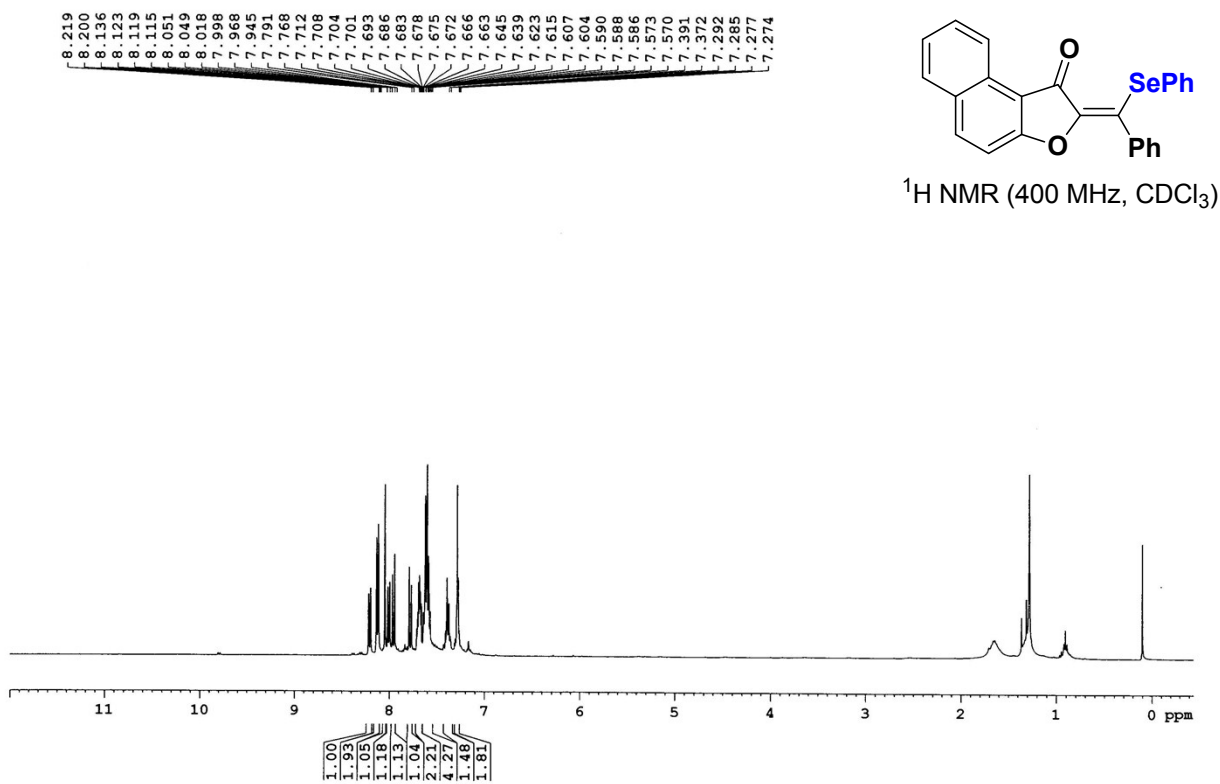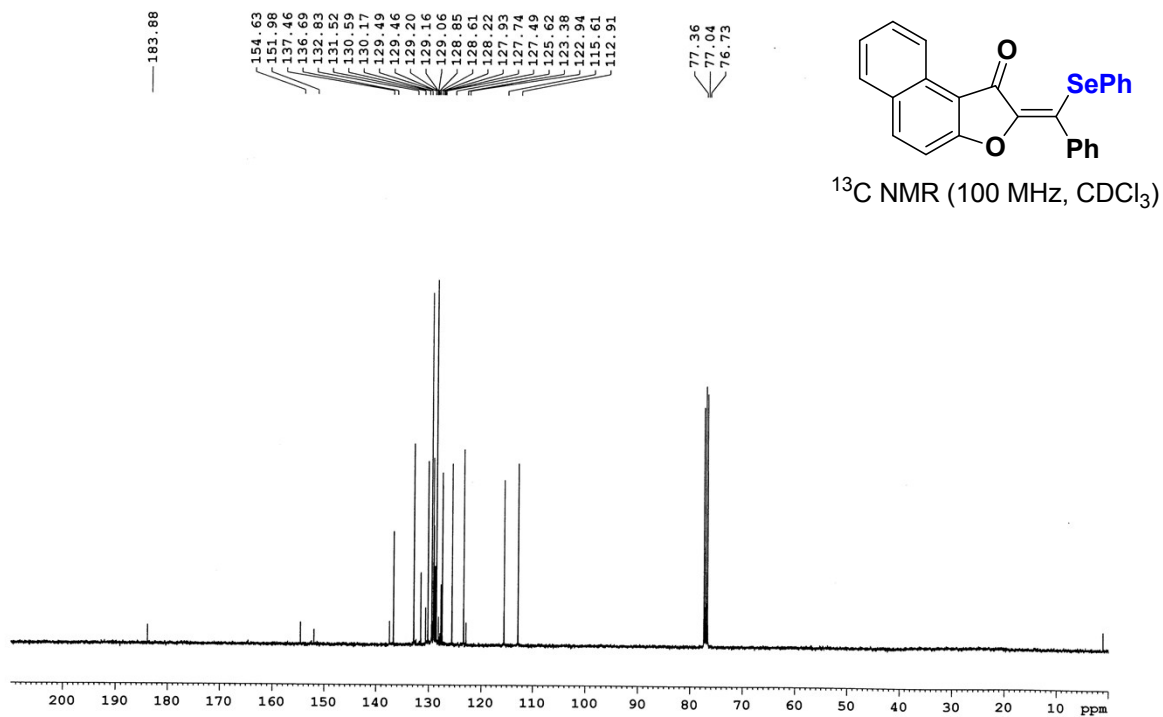

**(E)-2-((benzylselanyl)(phenyl)methylene)-7-methoxybenzofuran-3(2H)-one (5e)**

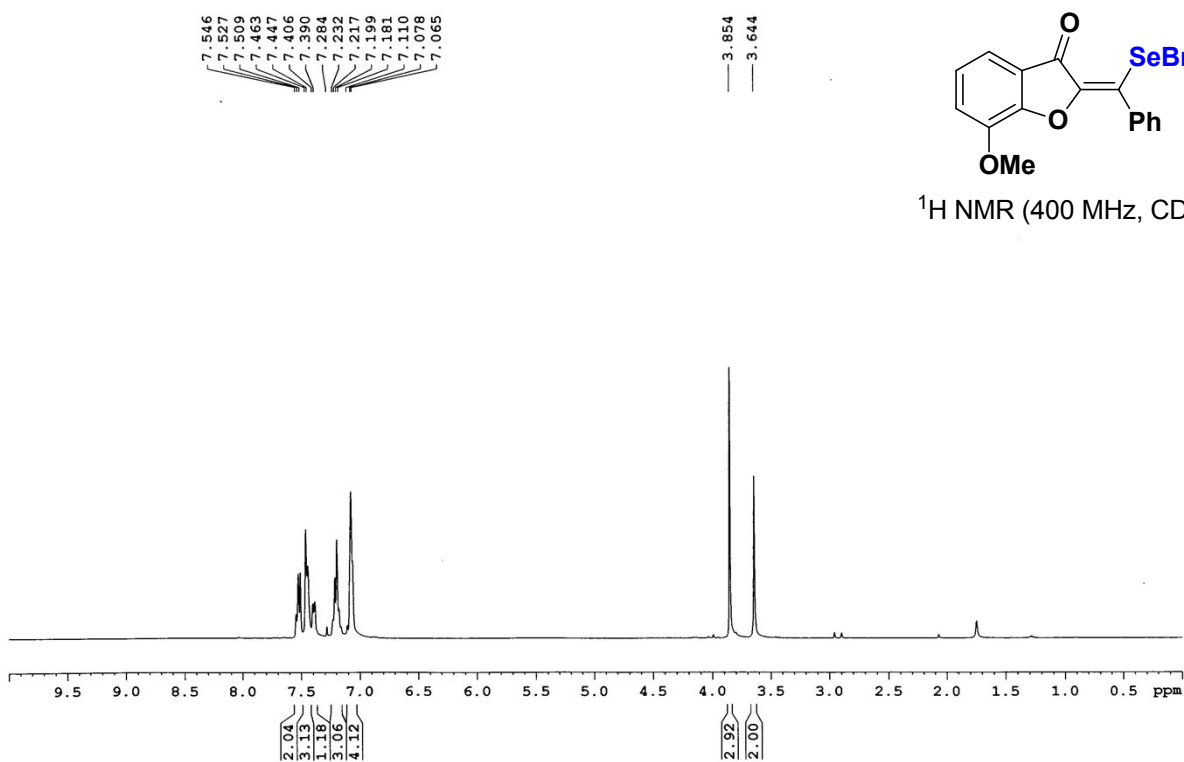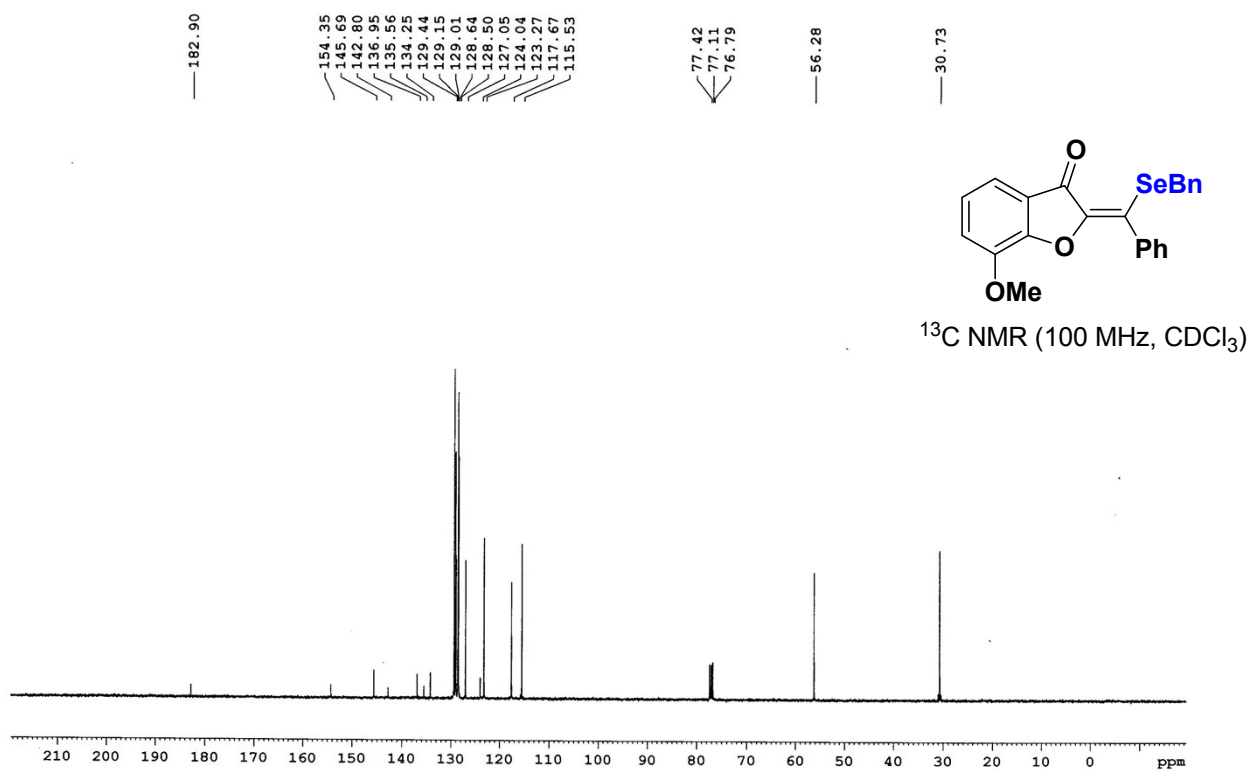

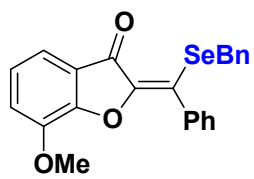

$^{77}\text{Se}$  NMR (76 MHz,  $\text{CDCl}_3$ )

446.37  
446.24  
446.10

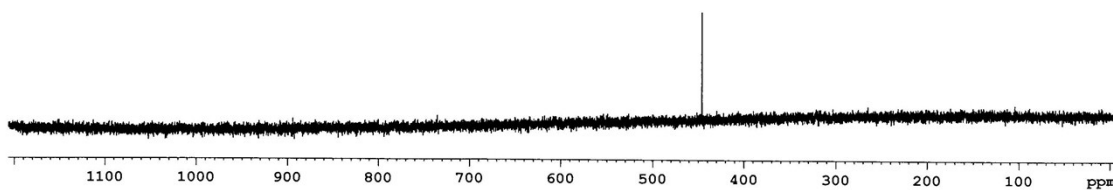

**(E)-7-methoxy-2-((phenylselanyl)(p-tolyl)methylene)benzofuran-3(2H)-one (5f)**

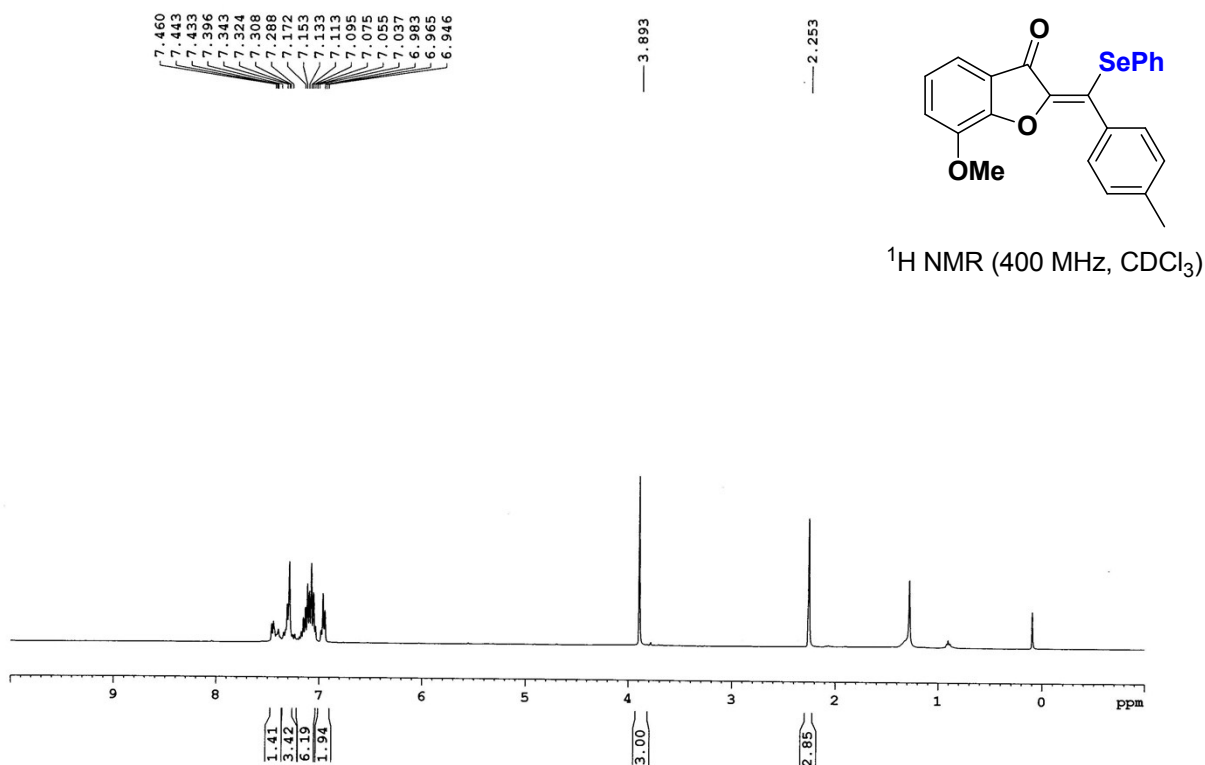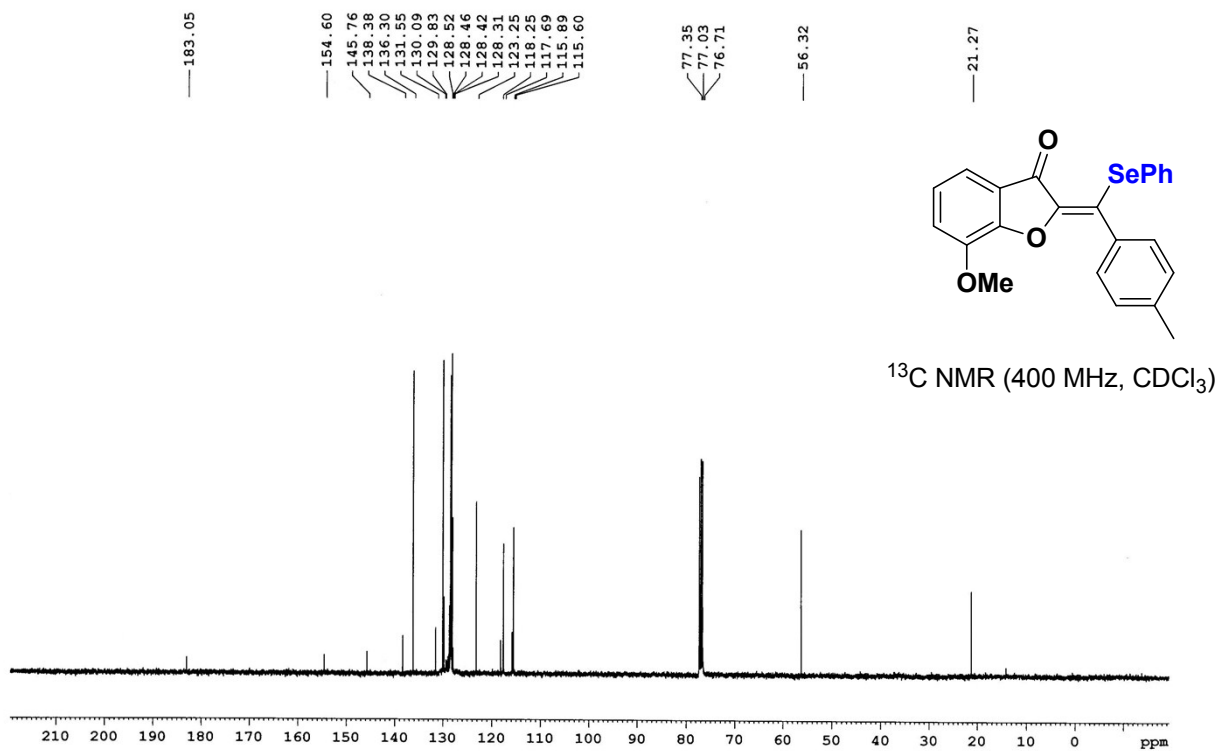

**(E)-2-(((3-methoxyphenyl)selenyl)(phenyl)methylene)benzofuran-3(2H)-one (5g)**

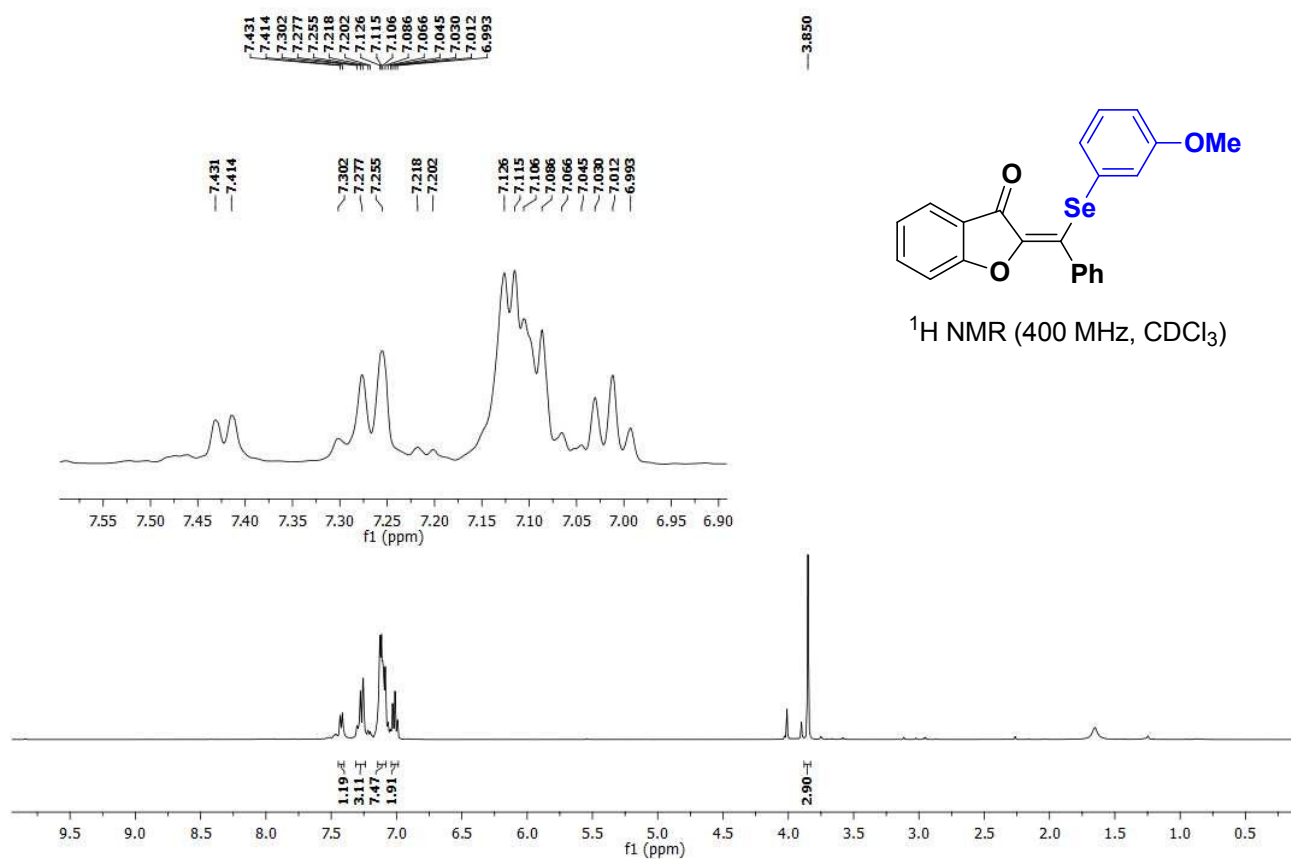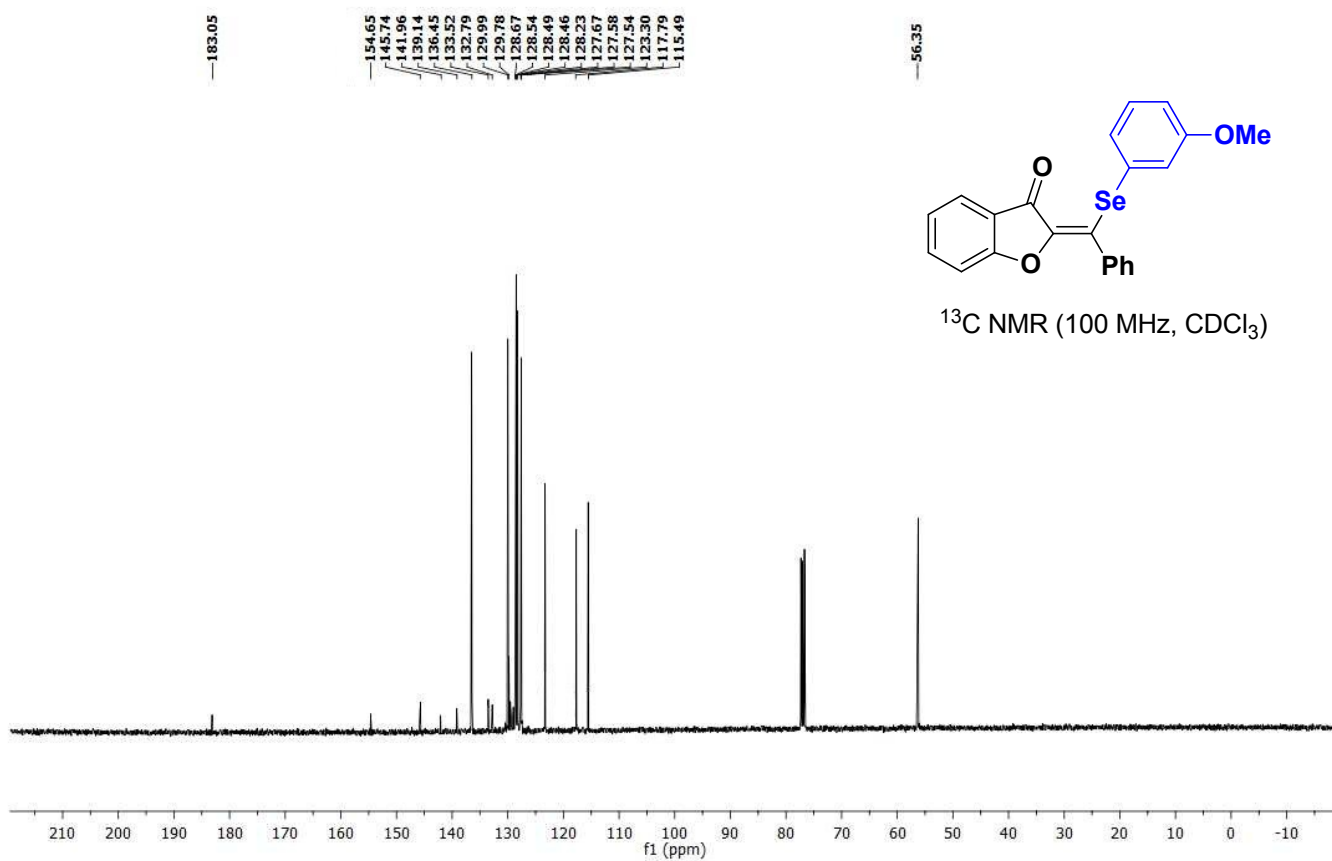



**(E)-2-(((4-bromophenyl)selenanyl)(phenyl)methylene)-7-methoxybenzofuran-3(2H)-one**  
**(5h)**

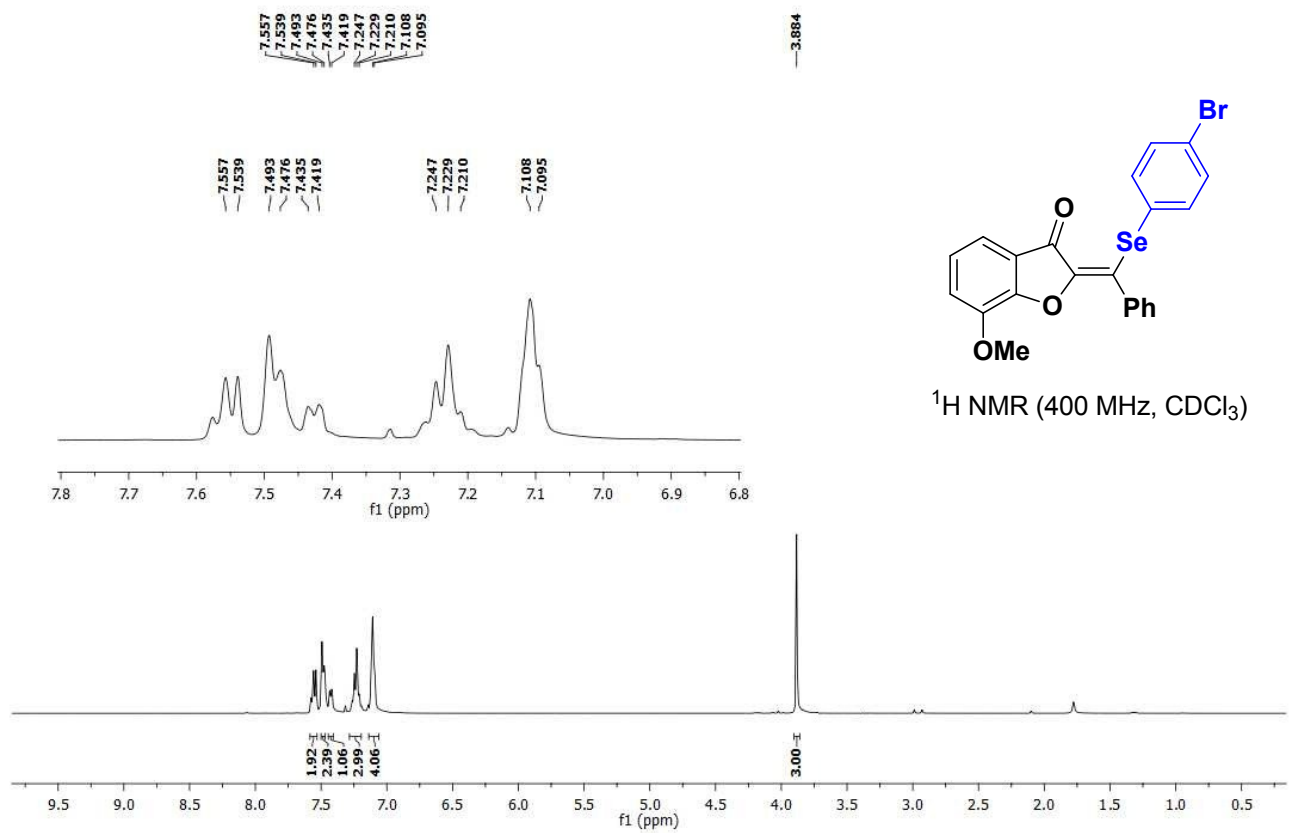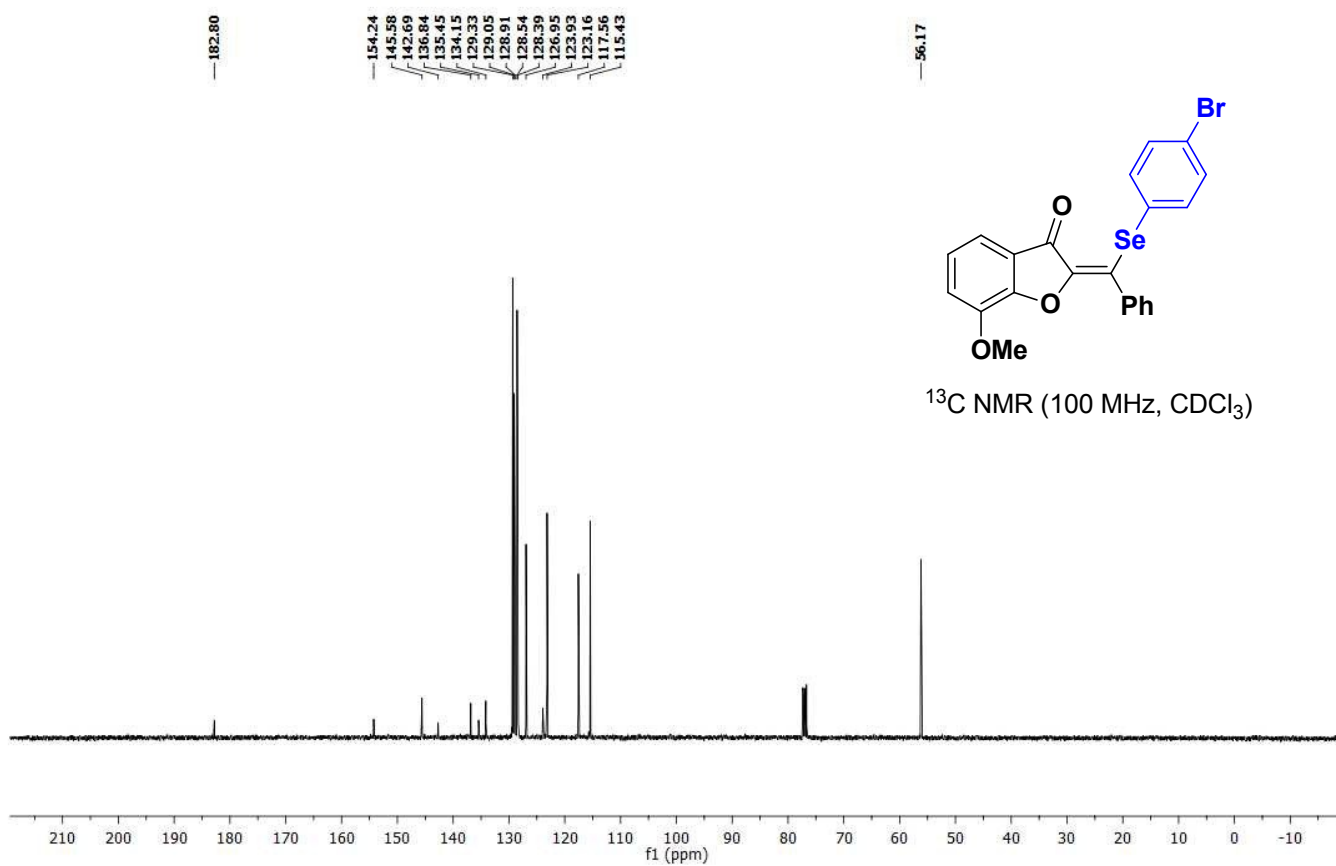

Supplement: d0ob00632g1.pdf [file d0ob00632g1.pdf]
